# Supplementary material for: Prediction of peptidoglycan hydrolases- a new class of antibacterial proteins
Source: PubMed Central journal article supplement (PMC4882796; doi:10.1186/s12864-016-2753-8), 2016-05-27

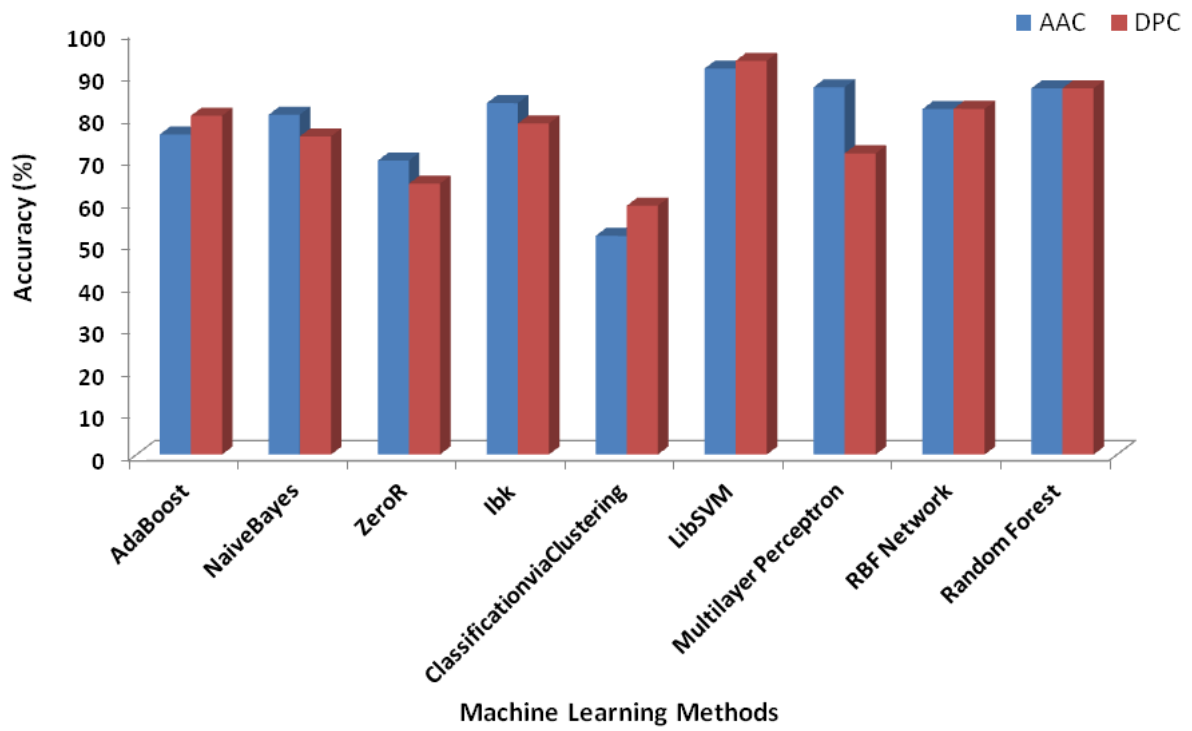

Supplement: 12864_2016_2753_MOESM1_ESM.pdf [file 12864_2016_2753_MOESM1_ESM.pdf]
