# Supplementary material for: Prediction of peptidoglycan hydrolases- a new class of antibacterial proteins
Source: PubMed Central journal article supplement (PMC4882796; doi:10.1186/s12864-016-2753-8), 2016-05-27
Supplement: 12864_2016_2753_MOESM11_ESM.pdf [file 12864_2016_2753_MOESM11_ESM.pdf]

**\*Class: Predicted peptidoglycan hydrolase class**

| <i>Bacillus anthracis str.</i> CDC 684 |                                                                   |               |
|----------------------------------------|-------------------------------------------------------------------|---------------|
| <b>GI ID</b>                           | <b>Protein</b>                                                    | <b>*Class</b> |
| gi 227812819 ref YP_002812828.1        | germination-specific N-acetylmuramoyl-L-alanine amidase           | A             |
| gi 227812888 ref YP_002812897.1        | invasion protein IagB domain protein                              | C             |
| gi 227813153 ref YP_002813162.1        | hypothetical protein BAMEG_0551                                   | A             |
| gi 227813157 ref YP_002813166.1        | prophage LambdaBa02, N-acetylmuramoyl-L-alanine amidase PlyL      | A             |
| gi 227813464 ref YP_002813473.1        | prophage LambdaBa01, N-acetylmuramoyl-L-alanine amidase, family 2 | A             |
| gi 227813532 ref YP_002813541.1        | putative N-acetylmuramoyl-L-alanine amidase                       | A             |
| gi 227813562 ref YP_002813571.1        | glycosyl hydrolase family protein                                 | C             |
| gi 227813638 ref YP_002813647.1        | hypothetical protein BAMEG_1042                                   | A             |
| gi 227813723 ref YP_002813732.1        | putative lysozyme                                                 | C             |
| gi 227813783 ref YP_002813792.1        | bacillolysin                                                      | A             |
| gi 227814330 ref YP_002814339.1        | x-prolyl-dipeptidyl aminopeptidase                                | A             |
| gi 227814382 ref YP_002814391.1        | putative glycosyl hydrolase, family 25                            | A             |
| gi 227814592 ref YP_002814601.1        | cell wall hydrolase                                               | A             |
| gi 227814662 ref YP_002814671.1        | N-acetylmuramoyl-L-alanine amidase family protein                 | A             |
| gi 227814745 ref YP_002814754.1        | N-acetylmuramoyl-L-alanine amidase family protein                 | A             |
| gi 227815025 ref YP_002815034.1        | hypothetical protein BAMEG_2436                                   | A             |
| gi 227815182 ref YP_002815191.1        | putative protease                                                 | B             |
| gi 227815277 ref YP_002815286.1        | peptidase, M23/M37 family                                         | A             |
| gi 227815362 ref YP_002815371.1        | N-acetylmuramoyl-L-alanine amidase family protein                 | A             |
| gi 227815467 ref YP_002815476.1        | transglycosylase                                                  | C             |
| gi 227815659 ref YP_002815668.1        | N-acetylmuramoyl-L-alanine amidase family protein                 | A             |
| gi 227816056 ref YP_002816065.1        | putative wall-associated protein                                  | A             |
| gi 227816163 ref YP_002816172.1        | putative S-layer protein                                          | C             |
| gi 227816237 ref YP_002816246.1        | surface-layer N-acetylmuramoyl-L-alanine amidase                  | A             |
| gi 227816259 ref YP_002816268.1        | hypothetical protein BAMEG_3686                                   | A             |
| gi 227816529 ref YP_002816538.1        | neutral protease Npr599                                           | A             |

|                                 |                                                             |   |
|---------------------------------|-------------------------------------------------------------|---|
| gi 227816643 ref YP_002816652.1 | putative prophage LambdaBa04, glycosyl hydrolase, family 25 | A |
| gi 227816649 ref YP_002816658.1 | hypothetical protein BAMEG_4127                             | A |
| gi 227817355 ref YP_002817364.1 | peptidase, M42 family                                       | A |
| gi 227817953 ref YP_002817962.1 | putative cell wall endopeptidase, NlpC/P60 family           | A |
| gi 227817995 ref YP_002818004.1 | putative cell wall hydrolase, partial                       | A |
| gi 227818158 ref YP_002818167.1 | cell wall hydrolase                                         | A |

| <i>Bacillus cereus</i> ATCC 10987 |                                                         |        |
|-----------------------------------|---------------------------------------------------------|--------|
| GI ID                             | Protein                                                 | *Class |
| gi 42779227 ref NP_976474.1       | germination-specific N-acetylmuramoyl-L-alanine amidase | A      |
| gi 42779321 ref NP_976568.1       | invasion protein IagB domain protein                    | C      |
| gi 42779496 ref NP_976743.1       | N-acetylmuramoyl-L-alanine amidase domain protein       | A      |
| gi 42779745 ref NP_976992.1       | neutral protease                                        | A      |
| gi 42780060 ref NP_977307.1       | N-acetylmuramoyl-L-alanine amidase, family 3            | A      |
| gi 42780148 ref NP_977395.1       | S-layer protein, putative                               | C      |
| gi 42780276 ref NP_977523.1       | wall associated protein, putative                       | A      |
| gi 42780281 ref NP_977528.1       | cell wall-associated protein, putative                  | A      |
| gi 42780349 ref NP_977596.1       | wall-associated protein, putative                       | A      |
| gi 42780694 ref NP_977941.1       | N-acetylmuramoyl-L-alanine amidase, family 2            | A      |
| gi 42780831 ref NP_978078.1       | flagellar hook-associated protein, putative             | A      |
| gi 42780854 ref NP_978101.1       | transglycosylase, SLT family                            | C      |
| gi 42780958 ref NP_978205.1       | N-acetylmuramoyl-L-alanine amidase, family 3            | A      |
| gi 42781022 ref NP_978269.1       | conserved hypothetical protein                          | A      |
| gi 42781106 ref NP_978353.1       | NLP/P60 family protein                                  | A      |
| gi 42781139 ref NP_978386.1       | protease, putative                                      | B      |
| gi 42781473 ref NP_978720.1       | alkaline serine protease, subtilase family              | A      |
| gi 42781673 ref NP_978920.1       | cell wall hydrolase                                     | A      |
| gi 42781819 ref NP_979066.1       | neutral protease                                        | A      |
| gi 42781905 ref NP_979152.1       | peptidase, U32 family                                   | A      |

|                             |                                              |   |
|-----------------------------|----------------------------------------------|---|
| gi 42781906 ref NP_979153.1 | N-acetylmuramoyl-L-alanine amidase           | A |
| gi 42781947 ref NP_979194.1 | hydrolase, CocE/NonD family                  | A |
| gi 42782600 ref NP_979847.1 | conserved hypothetical protein               | A |
| gi 42782677 ref NP_979924.1 | glycosyl hydrolase, family 18                | C |
| gi 42782716 ref NP_979963.1 | N-acetylmuramoyl-L-alanine amidase, putative | A |
| gi 42782763 ref NP_980010.1 | glycosyl hydrolase, family 25, putative      | A |
| gi 42783215 ref NP_980462.1 | 5'-nucleotidase family protein               | A |
| gi 42783748 ref NP_980995.1 | peptidase, M42 family                        | A |
| gi 42784346 ref NP_981593.1 | endopeptidase lytE, putative                 | A |
| gi 42784398 ref NP_981645.1 | enterotoxin                                  | A |
| gi 42784564 ref NP_981811.1 | cell wall hydrolase                          | A |
| gi 16077111 ref NP_387924.1 | sporulation-specific protease YabG           | B |

| <i>Bacillus subtilis subsp. subtilis</i> str. 168 |                                                         |               |
|---------------------------------------------------|---------------------------------------------------------|---------------|
| <b>GI ID</b>                                      | <b>Protein</b>                                          | <b>*Class</b> |
| gi 16077221 ref NP_388034.1                       | germination-specific N-acetylmuramoyl-L-alanine amidase | A             |
| gi 255767073 ref NP_388144.2                      | alkaline phosphatase D                                  | A             |
| gi 16077339 ref NP_388152.1                       | lipase EstA                                             | A             |
| gi 16077350 ref NP_388163.1                       | peptidoglycan L-alanyl-D-glutamate endopeptidase CwlK   | B             |
| gi 255767082 ref NP_388186.2                      | alpha-amylase                                           | A             |
| gi 16077772 ref NP_388586.1                       | rhamnogalacturonan endolyase YesW                       | A             |
| gi 16077823 ref NP_388637.1                       | pectate lyase                                           | A             |
| gi 16077851 ref NP_388665.1                       | nucleotide phosphoesterase                              | A             |
| gi 16078222 ref NP_389039.1                       | murein lytic transglycosylase YjbJ                      | C             |
| gi 16078311 ref NP_389128.1                       | N-acetylmuramoyl-L-alanine amidase XlyB                 | A             |
| gi 255767293 ref NP_389150.2                      | phage-like element PBSX protein XkdO                    | C             |
| gi 16078346 ref NP_389164.1                       | N-acetylmuramoyl-L-alanine amidase XlyA                 | A             |
| gi 16078534 ref NP_389353.1                       | bacillolysin                                            | A             |
| gi 16078594 ref NP_389413.1                       | bacillopeptidase F                                      | A             |

|                              |                                                         |   |
|------------------------------|---------------------------------------------------------|---|
| gi 255767407 ref NP_389623.2 | sporulation-specific N-acetylmuramoyl-L-alanine amidase | A |
| gi 16078877 ref NP_389698.1  | arabinoxylan arabinofuranohydrolase                     | A |
| gi 16078896 ref NP_389717.1  | D-alanyl-D-alanine carboxypeptidase DacC                | B |
| gi 255767473 ref NP_390018.2 | transglycosylase YomI                                   | B |
| gi 16079200 ref NP_390024.1  | N-acetylmuramoyl-L-alanine amidase BlyA                 | A |
| gi 16079204 ref NP_390028.1  | glycosyltransferase SunS                                | C |
| gi 255767533 ref NP_390299.2 | hypothetical protein BSU24190                           | A |
| gi 16079624 ref NP_390448.1  | N-acetylmuramoyl-L-alanine amidase CwlH                 | A |
| gi 16079643 ref NP_390467.1  | N-acetylmuramoyl-L-alanine amidase CwlA                 | A |
| gi 255767599 ref NP_390480.2 | hypothetical protein BSU26030                           | C |
| gi 16079812 ref NP_390636.1  | N-acetylmuramoyl-L-alanine amidase YrvJ                 | A |
| gi 16080615 ref NP_391442.1  | N-acetylmuramoyl-L-alanine amidase LytC                 | A |
| gi 16080616 ref NP_391443.1  | amidase enhancer                                        | A |
| gi 16080631 ref NP_391459.1  | beta-N-acetylglucosaminidase                            | C |
| gi 255767831 ref NP_391802.2 | wall-associated protein                                 | A |

| <i>Bacteroides fragilis</i> 638R |                                                              |        |
|----------------------------------|--------------------------------------------------------------|--------|
| GI ID                            | Protein                                                      | *Class |
| gi 375356633 ref YP_005109405.1  | putative lysozyme protein found in a conjugation transposase | C      |
| gi 375356722 ref YP_005109494.1  | putative exported glutaminase                                | C      |
| gi 375356725 ref YP_005109497.1  | putative TonB dependent receptor outer membrane protein      | C      |
| gi 375356759 ref YP_005109531.1  | putative TonB-dependent receptor exported protein            | A      |
| gi 375356781 ref YP_005109553.1  | putative TonB dependent outer membrane exported protein      | C      |
| gi 375356919 ref YP_005109691.1  | Putative TonB-linked outer membrane protein                  | A      |
| gi 375356937 ref YP_005109709.1  | hypothetical protein BF638R_0567                             | C      |
| gi 375357001 ref YP_005109773.1  | putative surface membrane protein                            | A      |
| gi 375357003 ref YP_005109775.1  | putative TonB dependent outer membrane exported protein      | A      |
| gi 375357005 ref YP_005109777.1  | putative TonB dependent outer membrane protein               | C      |
| gi 375357029 ref YP_005109801.1  | hypothetical protein BF638R_0665                             | A      |

|                                 |                                                         |   |
|---------------------------------|---------------------------------------------------------|---|
| gi 375357098 ref YP_005109870.1 | putative lytic murein transglycosylase                  | C |
| gi 375357210 ref YP_005109982.1 | hypothetical protein BF638R_0862                        | C |
| gi 375357268 ref YP_005110040.1 | Putative TonB-dependent outer membrane receptor protein | A |
| gi 375357293 ref YP_005110065.1 | Putative TonB-dependent outer membrane receptor protein | A |
| gi 375357295 ref YP_005110067.1 | Putative TonB-dependent outer membrane receptor protein | A |
| gi 375357532 ref YP_005110304.1 | hypothetical protein BF638R_1208                        | C |
| gi 375357644 ref YP_005110416.1 | putative outer membrane protein                         | A |
| gi 375357817 ref YP_005110589.1 | putative hemagglutinin                                  | A |
| gi 375358018 ref YP_005110790.1 | putative outer membrane protein                         | A |
| gi 375358024 ref YP_005110796.1 | putative TonB-dependent outer membrane receptor protein | A |
| gi 375358049 ref YP_005110821.1 | putative TonB-linked outer membrane protein             | C |
| gi 375358277 ref YP_005111049.1 | putative bacteriophage Gp25 protein                     | C |
| gi 375358405 ref YP_005111177.1 | putative TonB-dependent outer membrane receptor protein | C |
| gi 375358406 ref YP_005111178.1 | hypothetical protein BF638R_2118                        | C |
| gi 375358443 ref YP_005111215.1 | putative TonB-dependent outer membrane receptor protein | C |
| gi 375358611 ref YP_005111383.1 | hypothetical protein BF638R_2330                        | A |
| gi 375358777 ref YP_005111549.1 | putative iron transport-related exported protein        | C |
| gi 375358791 ref YP_005111563.1 | hypothetical protein BF638R_2515                        | A |
| gi 375358815 ref YP_005111587.1 | putative N-acetylmuramoyl-L-alanine amidase             | A |
| gi 375359053 ref YP_005111825.1 | putative N-acetylmuramoyl-L-alanine amidase             | A |
| gi 375359194 ref YP_005111966.1 | hypothetical protein BF638R_2948                        | A |
| gi 375359272 ref YP_005112044.1 | hypothetical protein BF638R_3031                        | A |
| gi 375359284 ref YP_005112056.1 | putative exported transglycosylase protein              | C |
| gi 375359410 ref YP_005112182.1 | hypothetical protein BF638R_3170                        | A |
| gi 375359445 ref YP_005112217.1 | hypothetical protein BF638R_3206                        | C |
| gi 375359465 ref YP_005112237.1 | hypothetical protein BF638R_3226                        | C |
| gi 375359605 ref YP_005112377.1 | putative cell wall biosynthesis related protein         | A |
| gi 375359621 ref YP_005112393.1 | putative peptidoglycan biosynthesis-related protein     | C |
| gi 375359688 ref YP_005112460.1 | hypothetical protein BF638R_3466                        | A |

|                                 |                                                      |   |
|---------------------------------|------------------------------------------------------|---|
| gi 375359845 ref YP_005112617.1 | Putative N-acetylmuramoyl-L-alanine amidase          | A |
| gi 375359849 ref YP_005112621.1 | hypothetical protein BF638R_3636                     | A |
| gi 375359899 ref YP_005112671.1 | putative exported N-acetylmuramoyl-L-alanine amidase | A |
| gi 375359996 ref YP_005112768.1 | hypothetical protein BF638R_3787                     | A |
| gi 375360294 ref YP_005113066.1 | putative outer membrane protein                      | A |
| gi 375360300 ref YP_005113072.1 | putative TonB-linked outer membrane protein          | A |
| gi 375360411 ref YP_005113183.1 | hypothetical protein BF638R_4238                     | C |
| gi 375360478 ref YP_005113250.1 | hypothetical protein BF638R_4312                     | A |
| gi 375360497 ref YP_005113269.1 | putative outer membrane protein                      | A |
| gi 375360505 ref YP_005113277.1 | putative outer membrane protein                      | A |
| gi 375360602 ref YP_005113374.1 | Putative TonB-linked outer membrane protein          | A |

| <i>Bdellovibrio bacteriovorus</i> HD100 |                                                           |        |
|-----------------------------------------|-----------------------------------------------------------|--------|
| GI ID                                   | Protein                                                   | *Class |
| gi 42521787 ref NP_967167.1             | hypothetical protein Bd0150                               | C      |
| gi 42521825 ref NP_967205.1             | hypothetical protein Bd0193                               | A      |
| gi 42522132 ref NP_967512.1             | murein transglycosylase D                                 | C      |
| gi 42522311 ref NP_967691.1             | cell wall surface anchor family protein                   | A      |
| gi 42522407 ref NP_967787.1             | adventurous gliding motility protein U                    | C      |
| gi 42522455 ref NP_967835.1             | cell wall surface anchor family protein                   | A      |
| gi 42522457 ref NP_967837.1             | hypothetical protein Bd0886                               | A      |
| gi 42522591 ref NP_967971.1             | hypothetical protein Bd1032                               | B      |
| gi 42522716 ref NP_968096.1             | hypothetical protein Bd1176                               | A      |
| gi 42522774 ref NP_968154.1             | hypothetical protein Bd1247                               | A      |
| gi 42522813 ref NP_968193.1             | fimbrial protein pilA                                     | C      |
| gi 42522854 ref NP_968234.1             | cell wall surface anchor family protein                   | A      |
| gi 42522963 ref NP_968343.1             | cell wall surface anchor family protein                   | A      |
| gi 42523042 ref NP_968422.1             | two-component hybrid sensor and regulator                 | A      |
| gi 42523112 ref NP_968492.1             | molybdopterin oxidoreductase, iron-sulfur binding subunit | A      |

|                             |                                         |   |
|-----------------------------|-----------------------------------------|---|
| gi 42523126 ref NP_968506.1 | RTX family exoprotein                   | A |
| gi 42523208 ref NP_968588.1 | cell wall surface anchor family protein | C |
| gi 42523770 ref NP_969150.1 | subtilisin-like serine protease         | A |
| gi 42523879 ref NP_969259.1 | cell wall surface anchor family protein | C |
| gi 42523970 ref NP_969350.1 | subtilisin like serine protease         | A |
| gi 42523973 ref NP_969353.1 | hypothetical protein Bd2548             | A |
| gi 42524003 ref NP_969383.1 | hypothetical protein Bd2581             | A |
| gi 42524110 ref NP_969490.1 | protease                                | A |
| gi 42524117 ref NP_969497.1 | hypothetical protein Bd2699             | A |
| gi 42524155 ref NP_969535.1 | hypothetical protein Bd2740             | C |
| gi 42524282 ref NP_969662.1 | hemagglutinin/hemolysin-related protein | A |
| gi 42524640 ref NP_970020.1 | cell wall surface anchor family protein | C |
| gi 42524641 ref NP_970021.1 | cell wall surface anchor family protein | A |
| gi 42524780 ref NP_970160.1 | periplasmic binding transport protein   | C |

| <i>Bifidobacterium animalis subsp. lactis</i> ATCC 27673 |                                                   |               |
|----------------------------------------------------------|---------------------------------------------------|---------------|
| <b>GI ID</b>                                             | <b>Protein</b>                                    | <b>*Class</b> |
| gi 549471592 ref YP_008605299.1                          | DO serine protease                                | A             |
| gi 549472233 ref YP_008605940.1                          | nicotinic acid mononucleotide adenylyltransferase | A             |
| gi 549472416 ref YP_008606123.1                          | hypothetical protein BLAC_04760                   | C             |
| gi 549472492 ref YP_008606199.1                          | N-acetyl transferase                              | C             |
| gi 549472570 ref YP_008606277.1                          | DNA gyrase subunit B                              | A             |
| gi 549472623 ref YP_008606330.1                          | oligopeptide ABC transporter periplasmic protein  | A             |
| gi 549472786 ref YP_008606493.1                          | fibronectin type III                              | A             |
| gi 549472820 ref YP_008606527.1                          | hypothetical protein BLAC_06860                   | C             |
| gi 549472826 ref YP_008606533.1                          | dTDP-4-dehydrorhamnose 3,5-epimerase              | A             |
| gi 549472864 ref YP_008606571.1                          | endo-1,4-beta-xylanase                            | A             |
| gi 549472936 ref YP_008606643.1                          | fimbrial subunit-like cell surface protein        | A             |

|                                 |                                 |   |
|---------------------------------|---------------------------------|---|
| gi 549472963 ref YP_008606670.1 | 1,4-beta-N-acetylmuramidase     | C |
| gi 549472987 ref YP_008606694.1 | xylan esterase                  | A |
| gi 549473045 ref YP_008606752.1 | hypothetical protein BLAC_08025 | C |

| <i>Bordetella pertussis</i> CS  |                                                |        |
|---------------------------------|------------------------------------------------|--------|
| GI ID                           | Protein                                        | *Class |
| gi 384202602 ref YP_005588341.1 | homoserine O-acetyltransferase                 | A      |
| gi 384202624 ref YP_005588363.1 | N-acetyl-anhydromuranmyl-L-alanine amidase     | A      |
| gi 384202810 ref YP_005588549.1 | N-acetylmuramoyl-L-alanine amidase             | A      |
| gi 384202862 ref YP_005588601.1 | outer membrane heme receptor                   | C      |
| gi 384202984 ref YP_005588723.1 | putative heme receptor                         | C      |
| gi 384203218 ref YP_005588957.1 | putative ferric siderophore receptor           | C      |
| gi 384203308 ref YP_005589047.1 | outer membrane porin protein                   | C      |
| gi 384203324 ref YP_005589063.1 | TonB-dependent receptor for iron transport     | C      |
| gi 384203325 ref YP_005589064.1 | TonB-dependent receptor for iron transport     | C      |
| gi 384203418 ref YP_005589157.1 | membrane-bound lytic murein transglycosylase B | C      |
| gi 384203495 ref YP_005589234.1 | D-alanyl-D-alanine carboxypeptidase            | B      |
| gi 384203505 ref YP_005589244.1 | putative transglycosylase                      | C      |
| gi 384203574 ref YP_005589313.1 | putative ferric siderophore receptor           | C      |
| gi 384203743 ref YP_005589482.1 | glycosyl hydrolase                             | C      |
| gi 384203787 ref YP_005589526.1 | flagellar rod assembly protein/muramidase FlgJ | C      |
| gi 384204113 ref YP_005589852.1 | putative peptidoglycan-binding protein         | C      |
| gi 384204127 ref YP_005589866.1 | hypothetical protein BPTD_1738                 | A      |
| gi 384204229 ref YP_005589968.1 | hemolysin activator-like protein               | C      |
| gi 384204282 ref YP_005590021.1 | putative heme storage protein                  | C      |
| gi 384204297 ref YP_005590036.1 | putative ferrisiderophore receptor             | C      |
| gi 384204311 ref YP_005590050.1 | putative extracellular solute-binding protein  | C      |
| gi 384204340 ref YP_005590079.1 | putative lipoprotein                           | C      |
| gi 384204341 ref YP_005590080.1 | putative ferric siderophore receptor           | A      |

|                                 |                                                                  |   |
|---------------------------------|------------------------------------------------------------------|---|
| gi 384204360 ref YP_005590099.1 | amidase                                                          | C |
| gi 384204614 ref YP_005590353.1 | putative transferase                                             | C |
| gi 384204679 ref YP_005590418.1 | putative binding-protein-dependent transport periplasmic protein | C |
| gi 384204728 ref YP_005590467.1 | putative exported hydrolase                                      | A |
| gi 384204757 ref YP_005590496.1 | potassium-transporting ATPase subunit A                          | C |
| gi 384204928 ref YP_005590667.1 | phosphoribosylformylglycinamide synthase                         | C |
| gi 384205087 ref YP_005590826.1 | membrane transport protein                                       | C |
| gi 384205144 ref YP_005590883.1 | outer membrane receptor FepA                                     | A |
| gi 384205150 ref YP_005590889.1 | adhesin                                                          | A |
| gi 384205165 ref YP_005590904.1 | putative TonB-dependent receptor                                 | C |
| gi 384205222 ref YP_005590961.1 | histone protein                                                  | A |
| gi 384205244 ref YP_005590983.1 | putative D-amino acid dehydrogenase small subunit                | C |
| gi 384205290 ref YP_005591029.1 | putative transglycosylase                                        | C |
| gi 384205352 ref YP_005591091.1 | hypothetical protein BPTD_3090                                   | C |
| gi 384205423 ref YP_005591162.1 | putative membrane-bound lytic murein transglycosylase D          | C |
| gi 384205544 ref YP_005591283.1 | putative phage lysozyme                                          | C |
| gi 384205566 ref YP_005591305.1 | hypothetical protein BPTD_3336                                   | C |
| gi 384205666 ref YP_005591405.1 | serum resistance protein                                         | A |
| gi 384205760 ref YP_005591499.1 | putative outer membrane protein                                  | C |
| gi 384205824 ref YP_005591563.1 | ferric siderophore receptor                                      | C |

| <i>Borrelia burgdorferi</i> B31 |                                                              |        |
|---------------------------------|--------------------------------------------------------------|--------|
| GI ID                           | Protein                                                      | *Class |
| gi 559797711 ref YP_008853941.1 | hypothetical protein BB_0531                                 | A      |
| gi 365992380 ref NP_212759.2    | N-acetylmuramoyl-L-alanine amidase                           | A      |
| gi 365992389 ref NP_212800.2    | N-acetylmuramoyl-L-alanine amidase domain-containing protein | A      |

| <i>Brucella abortus</i> S19 |         |        |
|-----------------------------|---------|--------|
| GI ID                       | Protein | *Class |

|                                 |                                                  |   |
|---------------------------------|--------------------------------------------------|---|
| gi 189023309 ref YP_001934077.1 | surface antigen                                  | A |
| gi 189023327 ref YP_001934095.1 | SLT domain-containing protein                    | C |
| gi 189023374 ref YP_001934142.1 | outer membrane protein                           | C |
| gi 189023640 ref YP_001934408.1 | hypothetical protein BAbS19_I03950               | C |
| gi 189023859 ref YP_001934627.1 | transglycosylase                                 | C |
| gi 189024095 ref YP_001934863.1 | Zinc metalloprotease                             | C |
| gi 189024098 ref YP_001934866.1 | Cell wall hydrolase/autolysin                    | A |
| gi 189024153 ref YP_001934921.1 | Secretion activator protein                      | C |
| gi 189024205 ref YP_001934973.1 | Beta-lactamase                                   | A |
| gi 189024215 ref YP_001934983.1 | ATP-dependent RNA helicase, DEAD/DEAH box family | A |
| gi 189024349 ref YP_001935117.1 | alkaline phosphatase                             | A |
| gi 189024549 ref YP_001935317.1 | hypothetical protein BAbS19_I13480               | C |
| gi 189024567 ref YP_001935335.1 | SLT domain-containing protein                    | C |
| gi 189024568 ref YP_001935336.1 | peptidoglycan binding domain 1                   | A |
| gi 189024571 ref YP_001935339.1 | glycoside hydrolase family protein               | C |
| gi 189024625 ref YP_001935393.1 | SH3 domain-containing protein                    | C |
| gi 189024844 ref YP_001935612.1 | peptidase family M48                             | A |
| gi 189024904 ref YP_001935672.1 | lytic murein transglycosylase                    | C |
| gi 189025075 ref YP_001935843.1 | outer membrane autotransporter                   | A |

| <i>Brucella melitensis</i> ATCC 23457 |                                               |        |
|---------------------------------------|-----------------------------------------------|--------|
| GI ID                                 | Protein                                       | *Class |
| gi 225851556 ref YP_002731789.1       | family 5 extracellular solute-binding protein | C      |
| gi 225851590 ref YP_002731823.1       | surface antigen D15                           | A      |
| gi 225851609 ref YP_002731842.1       | lytic transglycosylase                        | C      |
| gi 225851658 ref YP_002731891.1       | porin                                         | C      |
| gi 225851938 ref YP_002732171.1       | hypothetical protein BMEA_A0433               | C      |
| gi 225852166 ref YP_002732399.1       | lytic transglycosylase                        | C      |
| gi 225852422 ref YP_002732655.1       | peptidase M48 Ste24p                          | C      |

|                                 |                                                     |   |
|---------------------------------|-----------------------------------------------------|---|
| gi 225852426 ref YP_002732659.1 | N-acetylmuramoyl-L-alanine amidase                  | A |
| gi 225852490 ref YP_002732723.1 | hypothetical protein BMEA_A1023                     | C |
| gi 225852555 ref YP_002732788.1 | DEAD/DEAH box helicase                              | A |
| gi 225852696 ref YP_002732929.1 | alkaline phosphatase                                | A |
| gi 225852701 ref YP_002732934.1 | lytic transglycosylase                              | C |
| gi 225852904 ref YP_002733137.1 | outer membrane assembly lipoprotein YfiO            | C |
| gi 225852924 ref YP_002733157.1 | lytic transglycosylase                              | C |
| gi 225852925 ref YP_002733158.1 | N-acetylmuramoyl-L-alanine amidase family 2 protein | A |
| gi 225852928 ref YP_002733161.1 | family 25 glycosyl hydrolase                        | C |
| gi 225853091 ref YP_002733324.1 | outer membrane protein Omp31                        | C |
| gi 225853211 ref YP_002733444.1 | peptidase M48 Ste24p                                | A |
| gi 225853270 ref YP_002733503.1 | lytic murein transglycosylase                       | C |

|                                                                   |                                             |               |
|-------------------------------------------------------------------|---------------------------------------------|---------------|
| <i>Campylobacter jejuni</i> subsp. <i>jejuni</i> NCTC 11168-BN148 |                                             |               |
| <b>GI ID</b>                                                      | <b>Protein</b>                              | <b>*Class</b> |
| gi 403055418 ref YP_006632823.1                                   | secreted transglycosylase                   | C             |
| gi 403055594 ref YP_006632999.1                                   | secreted transglycosylase                   | C             |
| gi 403056004 ref YP_006633409.1                                   | N-acetylmuramoyl-L-alanine amidase          | A             |
| gi 403056192 ref YP_006633597.1                                   | flagellar hook-associated protein FlgK      | A             |
| gi 403056325 ref YP_006633730.1                                   | hemin uptake system outer membrane receptor | A             |
| gi 403056387 ref YP_006633792.1                                   | lipoprotein                                 | A             |
| gi 403056437 ref YP_006633842.1                                   | flagellar hook protein FlgE                 | A             |

|                                  |                                             |               |
|----------------------------------|---------------------------------------------|---------------|
| <i>Chlamydia psittaci</i> 01DC12 |                                             |               |
| <b>GI ID</b>                     | <b>Protein</b>                              | <b>*Class</b> |
| gi 410858188 ref YP_006974128.1  | polymorphic outer membrane protein          | A             |
| gi 410858254 ref YP_006974194.1  | polymorphic outer membrane protein          | A             |
| gi 410858345 ref YP_006974285.1  | probable N-acetylmuramoyl-L-alanine amidase | A             |

|                                 |                           |   |
|---------------------------------|---------------------------|---|
| gi 410858667 ref YP_006974607.1 | putative exported protein | C |
|---------------------------------|---------------------------|---|

| <i>Clostridium botulinum</i> A str. ATCC 19397 |                                                                                   |        |
|------------------------------------------------|-----------------------------------------------------------------------------------|--------|
| GI ID                                          | Protein                                                                           | *Class |
| gi 153930851 ref YP_001382608.1                | spore-cortex-lytic enzyme                                                         | C      |
| gi 153933510 ref YP_001382836.1                | N-acetylmuramoyl-L-alanine amidase-like protein                                   | A      |
| gi 153932683 ref YP_001382895.1                | NlpC/P60 family protein                                                           | A      |
| gi 153932011 ref YP_001383128.1                | N-acetylmuramoyl-L-alanine amidase                                                | A      |
| gi 153933381 ref YP_001383571.1                | glycosyl hydrolase family protein                                                 | D      |
| gi 153932511 ref YP_001383745.1                | hypothetical protein CLB_1418                                                     | C      |
| gi 153931814 ref YP_001383776.1                | N-acetylmuramoyl-L-alanine amidase                                                | A      |
| gi 153933650 ref YP_001383784.1                | N-acetylmuramoyl-L-alanine amidase                                                | A      |
| gi 153932096 ref YP_001384038.1                | hypothetical protein CLB_1716                                                     | A      |
| gi 153934162 ref YP_001384040.1                | mannosyl-glycoprotein endo-beta-N-acetylglucosaminidase domain-containing protein | C      |
| gi 153933676 ref YP_001384481.1                | amidase                                                                           | A      |
| gi 153931921 ref YP_001384731.1                | N-acetylmuramoyl-L-alanine amidase                                                | A      |
| gi 153930828 ref YP_001385112.1                | N-acetylmuramoyl-L-alanine amidase                                                | A      |
| gi 153930977 ref YP_001385246.1                | N-acetylmuramoyl-L-alanine amidase                                                | A      |
| gi 153933559 ref YP_001385331.1                | transglycosylase                                                                  | C      |
| gi 153931252 ref YP_001385335.1                | N-acetylmuramoyl-L-alanine amidase                                                | A      |
| gi 153930900 ref YP_001385432.1                | N-acetylmuramoyl-L-alanine amidase                                                | A      |
| gi 153931954 ref YP_001385433.1                | N-acetylmuramoyl-L-alanine amidase                                                | A      |
| gi 153933593 ref YP_001385435.1                | beta-N-acetylglucosaminidase                                                      | C      |
| gi 153933993 ref YP_001385594.1                | Slt family transglycosylase                                                       | C      |
| gi 153932666 ref YP_001385758.1                | N-acetylmuramoyl-L-alanine amidase                                                | A      |

| <i>Clostridium perfringens</i> ATCC 13124 |                                    |        |
|-------------------------------------------|------------------------------------|--------|
| GI ID                                     | Protein                            | *Class |
| gi 110799774 ref YP_694575.1              | N-acetylmuramoyl-L-alanine amidase | A      |

|                              |                                                                                                                             |   |
|------------------------------|-----------------------------------------------------------------------------------------------------------------------------|---|
| gi 110800117 ref YP_695040.1 | N-acetylmuramoyl-L-alanine amidase                                                                                          | A |
| gi 110799389 ref YP_695058.1 | cell wall binding repeat-containing protein/mannosyl-glycoprotein endo-beta-N-acetylglucosamidase domain-containing protein | A |
| gi 110801433 ref YP_695416.1 | KID repeat-containing protein                                                                                               | A |
| gi 110798593 ref YP_695917.1 | beta-galactosidase                                                                                                          | A |
| gi 110799274 ref YP_696005.1 | NlpC/P60 family protein                                                                                                     | A |
| gi 110800924 ref YP_696189.1 | N-acetylmuramoyl-L-alanine amidase                                                                                          | A |
| gi 110800912 ref YP_696642.1 | 1A family penicillin-binding protein                                                                                        | A |
| gi 110800916 ref YP_696671.1 | Slt family transglycosylase                                                                                                 | C |
| gi 110799813 ref YP_697056.1 | N-acetylmuramoyl-L-alanine amidase                                                                                          | A |
| gi 110800108 ref YP_697250.1 | serine protease C                                                                                                           | A |

| <i>Clostridium tetani</i> 12124569 |                                                        |        |
|------------------------------------|--------------------------------------------------------|--------|
| GI ID                              | Protein                                                | *Class |
| gi 557604238 ref YP_008772349.1    | N-acetylmuramoyl-L-alanine amidase                     | A      |
| gi 557604349 ref YP_008772460.1    | N-acetylmuramoyl-L-alanine amidase                     | A      |
| gi 557604754 ref YP_008772865.1    | N-acetylmuramoyl-L-alanine amidase                     | A      |
| gi 557605005 ref YP_008773116.1    | N-acetylmuramoyl-L-alanine amidase                     | A      |
| gi 557605127 ref YP_008773238.1    | N-acetylmuramoyl-L-alanine amidase                     | A      |
| gi 557605190 ref YP_008773301.1    | spore peptidoglycan hydrolase(N-acetylglucosaminidase) | D      |
| gi 557605213 ref YP_008773324.1    | N-acetylmuramoyl-L-alanine amidase                     | A      |
| gi 557605553 ref YP_008773664.1    | N-acetylmuramoyl-L-alanine amidase                     | A      |
| gi 557605933 ref YP_008774044.1    | N-acetylmuramoyl-L-alanine amidase                     | A      |
| gi 557606206 ref YP_008774317.1    | N-acetylmuramoyl-L-alanine amidase                     | A      |
| gi 557606705 ref YP_008774816.1    | germination-specific N-acetylmuramoyl-L-alanineamidase | A      |

| <i>Corynebacterium diphtheriae</i> CDCE 8392 |                                    |        |
|----------------------------------------------|------------------------------------|--------|
| GI ID                                        | Protein                            | *Class |
| gi 376241875 ref YP_005132727.1              | N-acetylmuramoyl-L-alanine amidase | A      |

|                                 |                                                       |   |
|---------------------------------|-------------------------------------------------------|---|
| gi 376242098 ref YP_005132950.1 | putative secreted protein                             | C |
| gi 376242401 ref YP_005133253.1 | resuscitation-promoting factor A                      | C |
| gi 376242420 ref YP_005133272.1 | putative secreted protein                             | A |
| gi 376242512 ref YP_005133364.1 | putative secreted protein                             | C |
| gi 376242773 ref YP_005133625.1 | hypothetical protein CDCE8392_1084                    | A |
| gi 376243158 ref YP_005134010.1 | histidinol dehydrogenase                              | A |
| gi 376243213 ref YP_005134065.1 | hypothetical protein CDCE8392_1529                    | C |
| gi 376243216 ref YP_005134068.1 | ubiquinol-cytochrome C reductase cytochrome C subunit | C |
| gi 376243943 ref YP_005134795.1 | putative hydrolase                                    | A |

| <i>Coxiella burnetii</i> RSA 331 |                                                                                    |        |
|----------------------------------|------------------------------------------------------------------------------------|--------|
| GI ID                            | Protein                                                                            | *Class |
| gi 161830043 ref YP_001596320.1  | N-acetylmuramoyl-L-alanine amidase/peptidoglycan binding domain-containing protein | A      |
| gi 161830719 ref YP_001596641.1  | N-acetylmuramoyl-L-alanine amidase                                                 | A      |
| gi 161830681 ref YP_001596697.1  | phage lysozyme                                                                     | C      |
| gi 161830665 ref YP_001597802.1  | D-alanyl-D-alanine carboxypeptidase/D-alanyl-D-alanine-endopeptidase               | B      |

| <i>Deinococcus radiodurans</i> R1 |                                                             |        |
|-----------------------------------|-------------------------------------------------------------|--------|
| GI ID                             | Protein                                                     | *Class |
| gi 15805048 ref NP_293732.1       | metal-dependent hydrolase                                   | A      |
| gi 15805161 ref NP_293847.1       | hypothetical protein DR_0121                                | C      |
| gi 15805407 ref NP_294102.1       | outer membrane protein                                      | C      |
| gi 15805410 ref NP_294106.1       | S-layer-like array-like protein                             | C      |
| gi 15805432 ref NP_294128.1       | alpha-dextran endo-1,6-alpha-glucosidase                    | C      |
| gi 15805588 ref NP_294284.1       | maltose ABC transporter periplasmic maltose-binding protein | C      |
| gi 15805734 ref NP_294430.1       | hypothetical protein DR_0707                                | C      |
| gi 15805735 ref NP_294431.1       | hypothetical protein DR_0708                                | C      |
| gi 15805961 ref NP_294661.1       | TPR repeat-containing protein                               | C      |
| gi 15806250 ref NP_294955.1       | hypothetical protein DR_1231                                | A      |

|                             |                                                       |   |
|-----------------------------|-------------------------------------------------------|---|
| gi 15806308 ref NP_295014.1 | extracellular solute-binding protein                  | A |
| gi 15806404 ref NP_295110.1 | N-acetylmuramoyl-L-alanine amidase                    | A |
| gi 15806455 ref NP_295161.1 | ABC transporter periplasmic substrate-binding protein | C |
| gi 15806503 ref NP_295214.1 | carboxyl-terminal protease                            | C |
| gi 15806631 ref NP_295348.1 | amidase                                               | A |
| gi 15806637 ref NP_295355.1 | N-acetylmuramoyl-L-alanine amidase                    | A |
| gi 15806891 ref NP_295614.1 | TPR repeat-containing protein                         | C |
| gi 15806953 ref NP_295678.1 | extracellular solute-binding protein                  | C |
| gi 15807248 ref NP_295978.1 | erythromycin esterase                                 | C |
| gi 15807262 ref NP_295992.1 | hypothetical protein DR_2271                          | C |
| gi 15807301 ref NP_296031.1 | hypothetical protein DR_2310                          | C |
| gi 15807384 ref NP_296115.1 | N-acetylmuramoyl-L-alanine amidase                    | A |
| gi 15807493 ref NP_296228.1 | hexagonally packed intermediate-layer surface protein | A |
| gi 15807551 ref NP_296287.1 | N-acetylmuramoyl-L-alanine amidase-like protein       | A |
| gi 15807560 ref NP_296297.1 | S-layer protein                                       | A |
| gi 15807606 ref NP_296345.1 | carboxylesterase, type B                              | C |

|                                  |                           |               |
|----------------------------------|---------------------------|---------------|
| <i>Ehrlichia canis</i> str. Jake |                           |               |
| <b>GI ID</b>                     | <b>Protein</b>            | <b>*Class</b> |
| gi 73667469 ref YP_303485.1      | methionine aminopeptidase | A             |

|                                                              |                                                        |               |
|--------------------------------------------------------------|--------------------------------------------------------|---------------|
| <i>Enterobacter cloacae</i> subsp. <i>cloacae</i> ATCC 13047 |                                                        |               |
| <b>GI ID</b>                                                 | <b>Protein</b>                                         | <b>*Class</b> |
| gi 296100391 ref YP_003610537.1                              | maltose-6'-phosphate glucosidase                       | A             |
| gi 296100417 ref YP_003610563.1                              | putative maltoporin                                    | C             |
| gi 296100567 ref YP_003610713.1                              | hypothetical protein ECL_00196                         | C             |
| gi 296100595 ref YP_003610741.1                              | putative lipase                                        | C             |
| gi 296100751 ref YP_003610897.1                              | Putative RND efflux system, outer membrane lipoprotein | C             |
| gi 296100783 ref YP_003610929.1                              | pilus biogenesis protein PilL                          | A             |

|                                 |                                                     |   |
|---------------------------------|-----------------------------------------------------|---|
| gi 296100791 ref YP_003610937.1 | PilT protein                                        | C |
| gi 296100798 ref YP_003610944.1 | hypothetical protein ECL_00429                      | C |
| gi 296100936 ref YP_003611082.1 | N-acetylmuramoyl-l-alanine amidase II               | A |
| gi 296101055 ref YP_003611201.1 | putative transposase                                | C |
| gi 296101172 ref YP_003611318.1 | lytic murein transglycosylase                       | C |
| gi 296101272 ref YP_003611418.1 | anhydro-N-acetylmuramyl-tripeptide amidase          | A |
| gi 296101287 ref YP_003611433.1 | Phage-related lysozyme (muraminidase)               | C |
| gi 296101306 ref YP_003611452.1 | fimbrial usher protein                              | A |
| gi 296101376 ref YP_003611522.1 | membrane-bound lytic murein transglycosylase D      | C |
| gi 296101383 ref YP_003611529.1 | hypothetical protein ECL_01017                      | A |
| gi 296101404 ref YP_003611550.1 | outer membrane efflux protein                       | C |
| gi 296101493 ref YP_003611639.1 | hypothetical protein ECL_01129                      | A |
| gi 296101683 ref YP_003611829.1 | phage lysozyme                                      | C |
| gi 296101878 ref YP_003612024.1 | L,D-carboxypeptidase A                              | B |
| gi 296101879 ref YP_003612025.1 | lytic transglycosylase, catalytic                   | C |
| gi 296101882 ref YP_003612028.1 | TonB-dependent siderophore receptor                 | C |
| gi 296102071 ref YP_003612217.1 | gp16                                                | C |
| gi 296102135 ref YP_003612281.1 | putative extracellular lipase                       | A |
| gi 296102159 ref YP_003612305.1 | murein peptide amidase A                            | B |
| gi 296102160 ref YP_003612306.1 | putative transport periplasmic protein              | C |
| gi 296102224 ref YP_003612370.1 | TonB-dependent siderophore receptor                 | C |
| gi 296102430 ref YP_003612576.1 | outer membrane transport protein, type I secretion  | C |
| gi 296102726 ref YP_003612872.1 | outer membrane usher protein LpfC                   | A |
| gi 296102769 ref YP_003612915.1 | hypothetical protein ECL_02423                      | C |
| gi 296102818 ref YP_003612964.1 | MltA-interacting MipA family protein                | C |
| gi 296102880 ref YP_003613026.1 | ferric-rhodotorulic acid outer membrane transporter | C |
| gi 296102902 ref YP_003613048.1 | flagellar hook-associated protein FlgK              | C |
| gi 296102903 ref YP_003613049.1 | flagellar rod assembly protein/muramidase FlgJ      | C |
| gi 296103072 ref YP_003613218.1 | hypothetical protein ECL_02728                      | C |

|                                 |                                                                    |   |
|---------------------------------|--------------------------------------------------------------------|---|
| gi 296103130 ref YP_003613276.1 | hypothetical protein ECL_02786                                     | C |
| gi 296103131 ref YP_003613277.1 | glycoside hydrolase family 18 protein                              | A |
| gi 296103148 ref YP_003613294.1 | N-acetylmuramoyl-L-alanine amidase                                 | A |
| gi 296103230 ref YP_003613376.1 | peptide/nickel transport system substrate-binding protein          | C |
| gi 296103255 ref YP_003613401.1 | outer membrane protein X                                           | C |
| gi 296103346 ref YP_003613492.1 | alpha-ketoglutarate decarboxylase                                  | A |
| gi 296103432 ref YP_003613578.1 | hypothetical protein ECL_03093                                     | A |
| gi 296103510 ref YP_003613656.1 | TonB-dependent siderophore receptor                                | A |
| gi 296103546 ref YP_003613692.1 | phage lysozyme                                                     | C |
| gi 296103737 ref YP_003613883.1 | fimbrillin MatB                                                    | C |
| gi 296103782 ref YP_003613928.1 | D-alanyl-D-alanine endopeptidase                                   | B |
| gi 296103833 ref YP_003613979.1 | putative peptide/nickel transport system substrate-binding protein | C |
| gi 296103909 ref YP_003614055.1 | phage lysozyme                                                     | C |
| gi 296104014 ref YP_003614160.1 | penicillin-insensitive murein endopeptidase                        | B |
| gi 296104095 ref YP_003614241.1 | N-acetylmuramoyl-L-alanine amidase I                               | A |
| gi 296104112 ref YP_003614258.1 | putative lipoprotein                                               | C |
| gi 296104232 ref YP_003614378.1 | putative transglycosylase                                          | C |
| gi 296104375 ref YP_003614521.1 | murein hydrolase B                                                 | C |
| gi 296104477 ref YP_003614623.1 | N-acetylmuramoyl-L-alanine amidase                                 | A |
| gi 296104524 ref YP_003614670.1 | putative outer membrane protein A                                  | C |
| gi 296104625 ref YP_003614771.1 | murein transglycosylase C                                          | C |
| gi 296104689 ref YP_003614835.1 | iron complex outermembrane receptor protein                        | A |
| gi 296104696 ref YP_003614842.1 | hypothetical protein ECL_04364                                     | C |
| gi 296104726 ref YP_003614872.1 | serine protease                                                    | C |
| gi 296104744 ref YP_003614890.1 | Phage baseplate assembly protein                                   | C |
| gi 296104751 ref YP_003614897.1 | phage lysozyme                                                     | C |
| gi 296104893 ref YP_003615039.1 | D-alanyl-D-alanine carboxypeptidase                                | B |
| gi 296105248 ref YP_003615394.1 | hypothetical protein ECL_04921                                     | C |
| gi 296105299 ref YP_003615445.1 | phospholipase A                                                    | C |

|                                 |                                                  |   |
|---------------------------------|--------------------------------------------------|---|
| gi 296105346 ref YP_003615492.1 | vitamin B12/cobalamin outer membrane transporter | A |
|---------------------------------|--------------------------------------------------|---|

| <i>Enterococcus faecalis</i> 62 |                                                                                  |        |
|---------------------------------|----------------------------------------------------------------------------------|--------|
| GI ID                           | Protein                                                                          | *Class |
| gi 384516875 ref YP_005704180.1 | hypothetical protein EF62_0150                                                   | A      |
| gi 384516984 ref YP_005704289.1 | hypothetical protein EF62_0259                                                   | A      |
| gi 384517031 ref YP_005704336.1 | hypothetical protein EF62_0306                                                   | A      |
| gi 384517244 ref YP_005704549.1 | nlpC/P60 family protein                                                          | B      |
| gi 384518077 ref YP_005705382.1 | N-acetylmuramoyl-L-alanine amidase family protein                                | A      |
| gi 384518197 ref YP_005705502.1 | Endocarditis and Biofilm-Associated Pilus subunitA                               | A      |
| gi 384518333 ref YP_005705638.1 | extracellular solute-binding family protein                                      | C      |
| gi 384518390 ref YP_005705695.1 | N-acetylmuramoyl-L-alanine amidase family protein                                | A      |
| gi 384518613 ref YP_005705918.1 | 1,4-beta-N-acetylmuramoylhydrolase                                               | C      |
| gi 384518821 ref YP_005706126.1 | Ig-like domain (group 4) family protein                                          | A      |
| gi 384518887 ref YP_005706192.1 | NlpC/P60 family protein                                                          | B      |
| gi 384519110 ref YP_005706415.1 | glycosyl hydrolases family 25 family protein                                     | C      |
| gi 384519152 ref YP_005706457.1 | extracellular solute-binding family protein                                      | C      |
| gi 384519185 ref YP_005706490.1 | internalin like repeat domain protein                                            | C      |
| gi 384519192 ref YP_005706497.1 | mannosyl-glycoprotein endo-beta-N-acetylglucosaminidase family protein           | C      |
| gi 384519428 ref YP_005706733.1 | mannosyl-glycoprotein endo-beta-N-acetylglucosaminidase autolysin family protein | A      |

| <i>Escherichia coli</i> str. K-12 substr. DH10B |                                                |        |
|-------------------------------------------------|------------------------------------------------|--------|
| GI ID                                           | Protein                                        | *Class |
| gi 170079747 ref YP_001729067.1                 | N-acetyl-anhydromuranmyl-L-alanine amidase     | A      |
| gi 170079842 ref YP_001729162.1                 | membrane-bound lytic murein transglycosylase D | C      |
| gi 170080136 ref YP_001729456.1                 | DLP12 prophage; lysozyme                       | C      |
| gi 170080137 ref YP_001729457.1                 | DLP12 prophage; murein endopeptidase           | B      |
| gi 170080237 ref YP_001729557.1                 | DLP12 prophage; lysozyme                       | C      |
| gi 170080238 ref YP_001729558.1                 | DLP12 prophage; murein endopeptidase           | B      |

|                                 |                                                                                       |   |
|---------------------------------|---------------------------------------------------------------------------------------|---|
| gi 170080464 ref YP_001729784.1 | catechololate siderophore receptor Fiu                                                | A |
| gi 170080473 ref YP_001729793.1 | outer membrane protein X                                                              | C |
| gi 170080489 ref YP_001729809.1 | periplasmic solute-binding component of a glutathione transporter                     | C |
| gi 170080526 ref YP_001729846.1 | amidase                                                                               | A |
| gi 170080583 ref YP_001729903.1 | hypothetical protein ECDH10B_0995                                                     | C |
| gi 170080681 ref YP_001730001.1 | outer membrane protein PgaA                                                           | C |
| gi 170080732 ref YP_001730052.1 | flagellar rod assembly protein/muramidase FlgJ                                        | C |
| gi 170080733 ref YP_001730053.1 | flagellar hook-associated protein FlgK                                                | C |
| gi 170080806 ref YP_001730126.1 | hypothetical protein ECDH10B_1231                                                     | C |
| gi 170080820 ref YP_001730140.1 | L,D-carboxypeptidase A                                                                | B |
| gi 170080830 ref YP_001730150.1 | adhesin                                                                               | A |
| gi 170080903 ref YP_001730223.1 | lysozyme-like protein                                                                 | C |
| gi 170080973 ref YP_001730293.1 | antibiotic ABC transporter periplasmic-binding protein                                | C |
| gi 170081004 ref YP_001730324.1 | murein peptide amidase A                                                              | A |
| gi 170081008 ref YP_001730328.1 | L-ala-gamma-D-glutamyl-meso-DAP ABC transporter periplasmic substrate-binding protein | C |
| gi 170081049 ref YP_001730369.1 | Rac prophage; tail fiber protein                                                      | A |
| gi 170081166 ref YP_001730486.1 | porin protein                                                                         | A |
| gi 170081177 ref YP_001730497.1 | hypothetical protein ECDH10B_1640                                                     | A |
| gi 170081178 ref YP_001730498.1 | putative lipoprotein                                                                  | A |
| gi 170081222 ref YP_001730542.1 | Qin prophage; lysozyme                                                                | C |
| gi 170081379 ref YP_001730699.1 | hypothetical protein ECDH10B_1860                                                     | C |
| gi 170081629 ref YP_001730949.1 | CP4-44 prophage; antigen 43 (Ag43) phase-variable biofilm formation autotransporter   | A |
| gi 170081727 ref YP_001731047.1 | hydrolase                                                                             | C |
| gi 170081733 ref YP_001731053.1 | outer membrane protein                                                                | A |
| gi 170081757 ref YP_001731077.1 | D-alanyl-D-alanine endopeptidase                                                      | B |
| gi 170081835 ref YP_001731155.1 | outer membrane porin protein C                                                        | C |
| gi 170081851 ref YP_001731171.1 | adhesin                                                                               | A |
| gi 170081943 ref YP_001731263.1 | hypothetical protein ECDH10B_2489                                                     | B |
| gi 170081944 ref YP_001731264.1 | penicillin-insensitive murein endopeptidase                                           | B |

|                                 |                                                            |   |
|---------------------------------|------------------------------------------------------------|---|
| gi 170081960 ref YP_001731280.1 | long-chain fatty acid outer membrane transporter           | C |
| gi 170082044 ref YP_001731364.1 | N-acetylmuramoyl-l-alanine amidase I                       | A |
| gi 170082104 ref YP_001731424.1 | peptidase                                                  | C |
| gi 170082168 ref YP_001731488.1 | putative transglycosylase                                  | C |
| gi 170082252 ref YP_001731572.1 | LysM domain/BON superfamily protein                        | C |
| gi 170082277 ref YP_001731597.1 | murein hydrolase B                                         | C |
| gi 170082385 ref YP_001731705.1 | N-acetylmuramoyl-L-alanine amidase                         | A |
| gi 170082515 ref YP_001731835.1 | murein transglycosylase C                                  | C |
| gi 170082580 ref YP_001731900.1 | hypothetical protein ECDH10B_3211                          | C |
| gi 170082681 ref YP_001732001.1 | outer membrane protein                                     | A |
| gi 170082717 ref YP_001732037.1 | D-alanyl-D-alanine carboxypeptidase                        | B |
| gi 170082742 ref YP_001732062.1 | monofunctional biosynthetic peptidoglycan transglycosylase | C |
| gi 170082844 ref YP_001732164.1 | general secretory pathway component, cryptic               | A |
| gi 170083040 ref YP_001732360.1 | cellulose synthase subunit BcsC                            | C |
| gi 170083079 ref YP_001732399.1 | hypothetical protein ECDH10B_3751                          | C |
| gi 170083435 ref YP_001732755.1 | vitamin B12/cobalamin outer membrane transporter           | A |
| gi 170083472 ref YP_001732792.1 | isocitrate lyase                                           | A |
| gi 170083600 ref YP_001732920.1 | beta-lactamase                                             | B |
| gi 170083615 ref YP_001732935.1 | N-acetylmuramoyl-l-alanine amidase II                      | A |
| gi 170083746 ref YP_001733066.1 | N-acetylnuraminic acid outer membrane channel protein      | C |
| gi 170083778 ref YP_001733098.1 | lytic murein transglycosylase                              | C |

| <i>Eubacterium rectale</i> ATCC 33656 |                                                         |        |
|---------------------------------------|---------------------------------------------------------|--------|
| GI ID                                 | Protein                                                 | *Class |
| gi 238922455 ref YP_002935968.1       | germination-specific N-acetylmuramoyl-L-alanine amidase | A      |
| gi 238922889 ref YP_002936402.1       | galactose/glucose-binding lipoprotein                   | A      |
| gi 238922938 ref YP_002936451.1       | hypothetical protein EUBREC_0526                        | A      |
| gi 238923299 ref YP_002936814.1       | cell surface protein                                    | C      |
| gi 238923300 ref YP_002936815.1       | N-acetylmuramoyl-L-alanine amidase                      | A      |

|                                                        |                                                                     |               |
|--------------------------------------------------------|---------------------------------------------------------------------|---------------|
| gi 238923349 ref YP_002936864.1                        | N-acetylmuramoyl-L-alanine amidase domain protein                   | A             |
| gi 238923461 ref YP_002936977.1                        | periplasmic alpha-amylase precursor                                 | C             |
| gi 238923496 ref YP_002937012.1                        | hypothetical protein EUBREC_1116                                    | A             |
| gi 238923511 ref YP_002937027.1                        | hypothetical protein in ImpB/MucB/SamB family of UV repair proteins | A             |
| gi 238923828 ref YP_002937344.1                        | soluble lytic murein transglycosylase precursor                     | C             |
| gi 238924227 ref YP_002937743.1                        | hypothetical protein EUBREC_1865                                    | A             |
| gi 238924298 ref YP_002937814.1                        | N-acetylmuramoyl-L-alanine amidase, C-terminus, partial             | A             |
| gi 238924347 ref YP_002937863.1                        | sporulation protein SpoIID                                          | A             |
| gi 238924438 ref YP_002937954.1                        | glycoside hydrolase family 25                                       | C             |
| gi 238924445 ref YP_002937961.1                        | hypothetical protein EUBREC_2086                                    | C             |
| gi 238924531 ref YP_002938047.1                        | hypothetical protein EUBREC_2173                                    | A             |
| gi 238924660 ref YP_002938176.1                        | mannosyl-glycoprotein endo-beta-N-acetylglucosaminidase             | C             |
| gi 238924728 ref YP_002938244.1                        | N-acetylmuramoyl-L-alanine amidase                                  | A             |
| gi 238924984 ref YP_002938500.1                        | N-acetylmuramoyl-L-alanine amidase                                  | A             |
| gi 238924985 ref YP_002938501.1                        | glycoside hydrolase family 25                                       | A             |
| gi 238925098 ref YP_002938615.1                        | cysteine proteinase                                                 | A             |
| gi 238925103 ref YP_002938620.1                        | cellulose 1,4-beta-cellobiosidase                                   | A             |
| gi 238925600 ref YP_002939117.1                        | flagellar capping protein                                           | C             |
| gi 238925642 ref YP_002939159.1                        | glycoside hydrolase family 25                                       | C             |
| gi 238926005 ref YP_002939523.1                        | hypothetical protein EUBREC_3663                                    | A             |
|                                                        |                                                                     |               |
| <i>Francisella tularensis</i> subsp. tularensis FSC198 |                                                                     |               |
| <b>GI ID</b>                                           | <b>Protein</b>                                                      | <b>*Class</b> |
| gi 110669802 ref YP_666359.1                           | N-acetyl-anhydromuranmyl-L-alanine amidase                          | A             |
| gi 110670020 ref YP_666577.1                           | soluble lytic murein transglycosylase                               | C             |
| gi 110670080 ref YP_666637.1                           | organic solvent tolerance protein                                   | C             |
| gi 110670142 ref YP_666699.1                           | lipoprotein                                                         | C             |
| gi 110670305 ref YP_666862.1                           | chitinase family 18 protein                                         | C             |
| gi 110670597 ref YP_667154.1                           | D-alanyl-D-alanine carboxypeptidase                                 | B             |

|                              |                                       |   |
|------------------------------|---------------------------------------|---|
| gi 110670598 ref YP_667155.1 | lipoprotein                           | C |
| gi 110670844 ref YP_667401.1 | inosine-5-monophosphate dehydrogenase | A |

| <i>Haemophilus influenzae</i> R2846 |                                                                      |        |
|-------------------------------------|----------------------------------------------------------------------|--------|
| GI ID                               | Protein                                                              | *Class |
| gi 386265241 ref YP_005828733.1     | Putative penicillin-binding protein 7                                | B      |
| gi 386265303 ref YP_005828795.1     | N-acetyl-anhydromuramyl-L-alanine amidase AmpD                       | A      |
| gi 386265372 ref YP_005828864.1     | Adhesion and penetration protein precursor                           | A      |
| gi 386265385 ref YP_005828877.1     | membrane-bound lytic murein transglycosylase F                       | C      |
| gi 386265444 ref YP_005828936.1     | Putative permease YcfA                                               | B      |
| gi 386265445 ref YP_005828937.1     | murein DD-endopeptidase, penicillin-insensitive                      | B      |
| gi 386265564 ref YP_005829056.1     | N-acetylmuramoyl-L-alanine amidase                                   | A      |
| gi 386265598 ref YP_005829090.1     | Penicillin-binding protein 2                                         | A      |
| gi 386265714 ref YP_005829206.1     | Lipoprotein LppC                                                     | C      |
| gi 386265913 ref YP_005829405.1     | D-alanyl-D-alanine carboxypeptidase/D-alanyl-D-alanine-endopeptidase | B      |
| gi 386266274 ref YP_005829766.1     | Immunoglobulin A1 protease                                           | A      |
| gi 386266507 ref YP_005829999.1     | Membrane-bound lytic murein transglycosylase C                       | C      |
| gi 386266561 ref YP_005830053.1     | Outer membrane antigenic lipoprotein B                               | C      |
| gi 386266608 ref YP_005830100.1     | Hemoglobin and hemoglobin-haptoglobin binding protein B              | A      |

| <i>Helicobacter pylori</i> 52   |                                                    |        |
|---------------------------------|----------------------------------------------------|--------|
| GI ID                           | Protein                                            | *Class |
| gi 384887064 ref YP_005761575.1 | outer membrane protein HopD                        | C      |
| gi 384887254 ref YP_005761765.1 | outer membrane protein (omp29)                     | C      |
| gi 384887315 ref YP_005761826.1 | putative vacuolating cytotoxin (VacA)-like protein | A      |
| gi 384887360 ref YP_005761871.1 | hypothetical protein HPKB_0346                     | C      |
| gi 384887581 ref YP_005762092.1 | N-acetylmuramoyl-L-alanine amidase                 | A      |
| gi 384887698 ref YP_005762209.1 | transglycosylase                                   | C      |
| gi 384887732 ref YP_005762243.1 | putative vacuolating cytotoxin (VacA)              | A      |

|                                 |                                       |   |
|---------------------------------|---------------------------------------|---|
| gi 384888054 ref YP_005762565.1 | outer membrane protein HopI           | C |
| gi 384888132 ref YP_005762643.1 | outer membrane protein - adhesin      | A |
| gi 384888357 ref YP_005762868.1 | iron-regulated outer membrane protein | A |
| gi 384888380 ref YP_005762891.1 | TonB-dependent siderophore receptor   | A |
| gi 384888435 ref YP_005762946.1 | lytic transglycosylase, catalytic     | C |

| <i>Klebsiella pneumoniae</i> subsp. pneumoniae 1084 |                                                                |        |
|-----------------------------------------------------|----------------------------------------------------------------|--------|
| GI ID                                               | Protein                                                        | *Class |
| gi 402778318 ref YP_006633864.1                     | maltose-6'-phosphate glucosidase                               | A      |
| gi 402778476 ref YP_006634022.1                     | BAX protein                                                    | C      |
| gi 402778520 ref YP_006634066.1                     | cellulose synthase operon protein C                            | C      |
| gi 402778809 ref YP_006634355.1                     | D-alanyl-D-alanine carboxypeptidase                            | B      |
| gi 402778872 ref YP_006634418.1                     | Pirin-like protein YhaK                                        | A      |
| gi 402778960 ref YP_006634506.1                     | type I secretion outer membrane protein, TolC                  | C      |
| gi 402779007 ref YP_006634553.1                     | membrane-bound lytic murein transglycosylase C                 | C      |
| gi 402779101 ref YP_006634647.1                     | type 1 fimbriae anchoring protein FimD                         | A      |
| gi 402779170 ref YP_006634716.1                     | N-acetylmuramoyl-L-alanine amidase                             | A      |
| gi 402779292 ref YP_006634838.1                     | TonB-dependent hemin , ferrichrome receptor                    | C      |
| gi 402779344 ref YP_006634890.1                     | membrane-bound lytic murein transglycosylase B                 | C      |
| gi 402779365 ref YP_006634911.1                     | L-proline glycine betaine binding ABC transporter protein ProX | C      |
| gi 402779394 ref YP_006634940.1                     | type 1 fimbriae anchoring protein FimD                         | C      |
| gi 402779493 ref YP_006635039.1                     | Slt family transglycosylase                                    | C      |
| gi 402779563 ref YP_006635109.1                     | outer membrane protein NlpB                                    | C      |
| gi 402779596 ref YP_006635142.1                     | N-acetylmuramoyl-L-alanine amidase                             | A      |
| gi 402779642 ref YP_006635188.1                     | long-chain fatty acid transport protein                        | C      |
| gi 402779649 ref YP_006635195.1                     | murein endopeptidase                                           | B      |
| gi 402779734 ref YP_006635280.1                     | outer membrane protein C                                       | C      |
| gi 402779759 ref YP_006635305.1                     | ABC transporter substrate-binding protein                      | C      |
| gi 402779798 ref YP_006635344.1                     | murein-DD-endopeptidase                                        | B      |

|                                 |                                                                            |   |
|---------------------------------|----------------------------------------------------------------------------|---|
| gi 402780059 ref YP_006635605.1 | outer membrane protein N                                                   | C |
| gi 402780096 ref YP_006635642.1 | alpha,alpha-trehalose-phosphate synthase                                   | C |
| gi 402780185 ref YP_006635731.1 | muramoyltetrapeptide carboxypeptidase                                      | B |
| gi 402780242 ref YP_006635788.1 | hypothetical protein A79E_1987                                             | C |
| gi 402780310 ref YP_006635856.1 | outer membrane protein                                                     | C |
| gi 402780392 ref YP_006635938.1 | ferrichrome-iron receptor                                                  | A |
| gi 402780409 ref YP_006635955.1 | ABC transporter, periplasmic iron binding protein                          | C |
| gi 402780590 ref YP_006636136.1 | tonB-dependent receptor yncD                                               | C |
| gi 402781035 ref YP_006636581.1 | outer membrane protein N                                                   | C |
| gi 402781101 ref YP_006636647.1 | hypothetical protein A79E_2852                                             | C |
| gi 402781117 ref YP_006636663.1 | Periplasmic Murein Peptide-Binding Protein MppA                            | C |
| gi 402781118 ref YP_006636664.1 | Gamma-D-Glutamyl-meso-Diaminopimelate Amidase                              | B |
| gi 402781185 ref YP_006636731.1 | ferrichrome-iron receptor                                                  | A |
| gi 402781299 ref YP_006636845.1 | phage tail fiber protein                                                   | C |
| gi 402781476 ref YP_006637022.1 | Phytanoyl-CoA dioxygenase                                                  | A |
| gi 402781586 ref YP_006637132.1 | N-acetylmuramoyl-L-alanine amidase                                         | A |
| gi 402781623 ref YP_006637169.1 | dipeptide-binding ABC transporter, periplasmic substrate-binding component | C |
| gi 402781644 ref YP_006637190.1 | Attachment invasion locus protein                                          | C |
| gi 402781806 ref YP_006637352.1 | Penicillin-binding protein 2 (PBP-2)                                       | A |
| gi 402781907 ref YP_006637453.1 | GntR family transcriptional regulator domain / Aspartate aminotransferase  | A |
| gi 402782080 ref YP_006637626.1 | maltoporin                                                                 | C |
| gi 402782294 ref YP_006637840.1 | membrane-bound lytic murein transglycosylase D                             | C |
| gi 402782409 ref YP_006637955.1 | N-acetylmuramoyl-L-alanine amidase                                         | A |
| gi 402782523 ref YP_006638069.1 | lytic murein transglycosylase                                              | C |
| gi 402782681 ref YP_006638227.1 | lytic murein transglycosylase                                              | C |
| gi 402782837 ref YP_006638383.1 | N-acetylmuramoyl-L-alanine amidase                                         | A |
| gi 402782951 ref YP_006638497.1 | Slt family transglycosylase                                                | C |
| gi 402783183 ref YP_006638729.1 | formate dehydrogenase O subunit alpha                                      | A |

| <i>Lactococcus lactis</i> subsp. <i>lactis</i> KLDS 4.0325 |                                               |        |
|------------------------------------------------------------|-----------------------------------------------|--------|
| GI ID                                                      | Protein                                       | *Class |
| gi 554464938 ref YP_008701786.1                            | hypothetical protein P620_01430               | A      |
| gi 554463348 ref YP_008701923.1                            | ABC transporter substrate-binding protein     | C      |
| gi 554463473 ref YP_008702091.1                            | penicillin-binding protein 1A                 | C      |
| gi 554465057 ref YP_008702289.1                            | hypothetical protein P620_04160               | A      |
| gi 554465066 ref YP_008702374.1                            | hypothetical protein P620_04600               | A      |
| gi 554465140 ref YP_008702577.1                            | hypothetical protein P620_05650               | A      |
| gi 554465254 ref YP_008702802.1                            | hypothetical protein P620_06795               | C      |
| gi 554465335 ref YP_008702995.1                            | N-acetyl-muramidase                           | C      |
| gi 554465384 ref YP_008703125.1                            | cell-wall-anchored protein SasA (LPXTG motif) | C      |
| gi 554465389 ref YP_008703158.1                            | hypothetical protein P620_08610               | A      |
| gi 554464258 ref YP_008703299.1                            | transglycosylase                              | C      |
| gi 554465505 ref YP_008703562.1                            | hypothetical protein P620_10695               | A      |
| gi 554465507 ref YP_008703564.1                            | hypothetical protein P620_10705               | D      |
| gi 554464492 ref YP_008703639.1                            | N-acetylmuramoyl-L-alanine amidase            | A      |
| gi 554465584 ref YP_008703859.1                            | hypothetical protein P620_12275               | A      |

| <i>Leptospira interrogans</i> serovar Lai str. 56601 |                                    |        |
|------------------------------------------------------|------------------------------------|--------|
| GI ID                                                | Protein                            | *Class |
| gi 24213159 ref NP_710640.1                          | N-acetylmuramoyl-L-alanine amidase | A      |
| gi 294827714 ref NP_710890.2                         | hypothetical protein LA_0709       | A      |
| gi 24213491 ref NP_710972.1                          | transglycosylase                   | C      |
| gi 24214269 ref NP_711750.1                          | hypothetical protein LA_1569       | A      |
| gi 24214900 ref NP_712381.1                          | amidase                            | A      |
| gi 24216032 ref NP_713513.1                          | cytoplasmic membrane protein       | A      |
| gi 294828308 ref NP_713576.2                         | hypothetical protein LA_3396       | A      |
| gi 24216133 ref NP_713614.1                          | N-acetylmuramoyl-L-alanine amidase | A      |
| gi 24216424 ref NP_713905.1                          | cytoplasmic membrane protein       | A      |

|                             |                              |   |
|-----------------------------|------------------------------|---|
| gi 24216569 ref NP_714050.1 | hypothetical protein LA_3870 | A |
| gi 24216971 ref NP_714452.1 | hypothetical protein LA_4272 | C |

| <i>Listeria monocytogenes</i> ATCC 19117 |                                            |        |
|------------------------------------------|--------------------------------------------|--------|
| GI ID                                    | Protein                                    | *Class |
| gi 405748350 ref YP_006671816.1          | cell wall surface anchor family protein    | A      |
| gi 405748480 ref YP_006671946.1          | N-acetylmuramoyl-L-alanine amidase         | A      |
| gi 405748481 ref YP_006671947.1          | Ser/Thr protein phosphatase family protein | A      |
| gi 405748794 ref YP_006672260.1          | WapA family wall-associated protein        | A      |
| gi 405748840 ref YP_006672306.1          | hypothetical protein LMOATCC19117_0505     | A      |
| gi 405748993 ref YP_006672459.1          | cell wall surface anchor family protein    | C      |
| gi 405749088 ref YP_006672554.1          | transglycosylase                           | C      |
| gi 405749430 ref YP_006672896.1          | N-acetylmuramoyl-L-alanine amidase         | A      |
| gi 405749549 ref YP_006673015.1          | N-acetylmuramoyl-L-alanine amidase         | A      |
| gi 405749550 ref YP_006673016.1          | N-acetylmuramoyl-L-alanine amidase         | A      |
| gi 405749865 ref YP_006673331.1          | N-acetylmuramoyl-L-alanine amidase         | A      |
| gi 405750016 ref YP_006673482.1          | cell wall surface anchor family protein    | A      |
| gi 405750297 ref YP_006673763.1          | cell wall surface anchor family protein    | A      |
| gi 405750563 ref YP_006674029.1          | N-acetylmuramoyl-L-alanine amidase         | A      |
| gi 405750788 ref YP_006674254.1          | glycosyl hydrolase family protein          | A      |
| gi 405750902 ref YP_006674368.1          | N-acetylmuramoyl-L-alanine amidase         | A      |
| gi 405750936 ref YP_006674402.1          | N-acetylmuramoyl-L-alanine amidase         | A      |
| gi 405751035 ref YP_006674501.1          | N-acetylmuramoyl-L-alanine amidase         | A      |

| <i>Mycobacterium tuberculosis</i> H37Rv |                       |        |
|-----------------------------------------|-----------------------|--------|
| GI ID                                   | Protein               | *Class |
| gi 397671843 ref YP_006513377.1         | oxidoreductase        | A      |
| gi 397672251 ref YP_006513786.1         | prolyl oligopeptidase | A      |
| gi 397672479 ref YP_006514014.1         | lipoprotein LpqP      | A      |

|                                 |                                                 |   |
|---------------------------------|-------------------------------------------------|---|
| gi 397672489 ref YP_006514024.1 | transcriptional regulator TetR-family           | C |
| gi 397672548 ref YP_006514083.1 | hypothetical protein RVBD_0739                  | C |
| gi 397672755 ref YP_006514290.1 | periplasmic phosphate-binding lipoprotein PstS1 | C |
| gi 397672848 ref YP_006514383.1 | lipoprotein LpqU                                | C |
| gi 397673070 ref YP_006514605.1 | membrane protein                                | C |
| gi 397673091 ref YP_006514626.1 | hypothetical protein RVBD_1251c                 | A |
| gi 397673128 ref YP_006514663.1 | mycolyltransferase II                           | A |
| gi 397673555 ref YP_006515090.1 | outer membrane protein MctB                     | A |
| gi 397673613 ref YP_006515148.1 | fatty-acid-CoA ligase FadD1                     | C |
| gi 397673617 ref YP_006515152.1 | hypothetical protein RVBD_1754c                 | C |
| gi 397673701 ref YP_006515236.1 | hypothetical protein RVBD_1836c                 | A |
| gi 397673817 ref YP_006515352.1 | hypothetical protein RVBD_1949c                 | C |
| gi 397673890 ref YP_006515425.1 | transposase                                     | C |
| gi 397674020 ref YP_006515555.1 | lipoprotein LppL                                | A |
| gi 397674216 ref YP_006515751.1 | periplasmic sugar-binding lipoprotein UspC      | C |
| gi 397674448 ref YP_006515983.1 | hypothetical protein RVBD_2542                  | A |
| gi 397674493 ref YP_006516028.1 | protein-export membrane protein SecD            | C |
| gi 397674892 ref YP_006516427.1 | exported or membrane protein                    | A |
| gi 397674983 ref YP_006516518.1 | short-chain alcohol dehydrogenase/reductase     | A |
| gi 397675382 ref YP_006516917.1 | PPE family protein PPE59                        | C |
| gi 397675391 ref YP_006516926.1 | transmembrane protein                           | C |
| gi 397675493 ref YP_006517028.1 | PPE family protein PPE63                        | C |
| gi 397675548 ref YP_006517083.1 | lipoprotein LpqF                                | A |
| gi 397675549 ref YP_006517084.1 | hypothetical protein RVBD_3594                  | A |
| gi 397675581 ref YP_006517116.1 | d-alanyl-d-alanine carboxypeptidase             | B |
| gi 397675674 ref YP_006517209.1 | N-acetylmuramoyl-L-alanine amidase              | A |
| gi 397675772 ref YP_006517308.1 | hypothetical protein RVBD_3811                  | A |
| gi 397675860 ref YP_006517396.1 | hypothetical protein RVBD_3896c                 | C |
| gi 397675880 ref YP_006517416.1 | N-acetylmuramoyl-L-alanine amidase              | A |

| <i>Myxococcus xanthus</i> DK 1622 |                                                |        |
|-----------------------------------|------------------------------------------------|--------|
| GI ID                             | Protein                                        | *Class |
| gi 108757004 ref YP_628299.1      | PHB depolymerase esterase                      | A      |
| gi 108757154 ref YP_628397.1      | transglycosylase SLT domain-containing protein | C      |
| gi 108762740 ref YP_628492.1      | transglycosylase SLT domain-containing protein | C      |
| gi 108757512 ref YP_628501.1      | hypothetical protein MXAN_0219                 | C      |
| gi 108762055 ref YP_628619.1      | N-acetylmuramoyl-L-alanine amidase             | A      |
| gi 108760456 ref YP_628832.1      | LysM domain-containing protein                 | A      |
| gi 108759659 ref YP_629243.1      | hypothetical protein MXAN_0982                 | A      |
| gi 108758072 ref YP_629248.1      | N-acetylmuramoyl-L-alanine amidase             | A      |
| gi 108762289 ref YP_629281.1      | hypothetical protein MXAN_1020                 | A      |
| gi 108758609 ref YP_629452.1      | hypothetical protein MXAN_1193                 | C      |
| gi 108757613 ref YP_629924.1      | hypothetical protein MXAN_1672                 | C      |
| gi 108761612 ref YP_629983.1      | cysteine-rich repeat-containing protein        | A      |
| gi 108758052 ref YP_630238.1      | N-acetylmuramoyl-L-alanine amidase             | A      |
| gi 108761197 ref YP_630373.1      | beta-lactamase                                 | C      |
| gi 108758669 ref YP_630480.1      | hypothetical protein MXAN_2259                 | C      |
| gi 108759519 ref YP_630535.1      | RIO1 family protein                            | A      |
| gi 108757922 ref YP_631031.1      | N-acetylmuramoyl-L-alanine amidase             | A      |
| gi 108758904 ref YP_631087.1      | hypothetical protein MXAN_2876                 | A      |
| gi 108758326 ref YP_631147.1      | hypothetical protein MXAN_2937                 | A      |
| gi 108762908 ref YP_631284.1      | transglycosylase SLT domain-containing protein | C      |
| gi 108758082 ref YP_631332.1      | S9A family peptidase                           | A      |
| gi 108758656 ref YP_631560.1      | transglycosylase SLT domain-containing protein | C      |
| gi 108759376 ref YP_631754.1      | M36 family peptidase                           | A      |
| gi 108763549 ref YP_631756.1      | amidase                                        | C      |
| gi 108761464 ref YP_631843.1      | hypothetical protein MXAN_3656                 | A      |
| gi 108759818 ref YP_631863.1      | hypothetical protein MXAN_3676                 | C      |

|                              |                                                       |   |
|------------------------------|-------------------------------------------------------|---|
| gi 108757251 ref YP_632066.1 | N-acetylmuramoyl-L-alanine amidase                    | A |
| gi 108762638 ref YP_632179.1 | N-acetylmuramoyl-L-alanine amidase                    | A |
| gi 108763880 ref YP_632213.1 | transglycosylase SLT domain-containing protein        | C |
| gi 108759662 ref YP_632309.1 | hypothetical protein MXAN_4134                        | C |
| gi 108759224 ref YP_632450.1 | hypothetical protein MXAN_4275                        | C |
| gi 108757180 ref YP_632494.1 | metallo-beta-lactamase                                | A |
| gi 108762752 ref YP_632562.1 | catalase KatB                                         | A |
| gi 108761453 ref YP_632794.1 | transglycosylase SLT domain-containing protein        | C |
| gi 108761241 ref YP_632826.1 | pilus biogenesis protein                              | C |
| gi 108762121 ref YP_632998.1 | endoglucanase                                         | C |
| gi 108761653 ref YP_633010.1 | hypothetical protein MXAN_4849, partial               | A |
| gi 108758494 ref YP_633421.1 | lysyl endopeptidase domain-containing protein         | C |
| gi 108762709 ref YP_633476.1 | phytase                                               | C |
| gi 108762400 ref YP_633530.1 | lipoprotein                                           | A |
| gi 108759536 ref YP_633538.1 | hypothetical protein MXAN_5391                        | A |
| gi 108758096 ref YP_633597.1 | M36 family peptidase                                  | C |
| gi 108761320 ref YP_633974.1 | Ig-like domain-containing protein                     | A |
| gi 108758420 ref YP_634267.1 | Ig-like domain/kelch domain-containing protein        | C |
| gi 108761497 ref YP_634374.1 | kelch motif-containing protein                        | A |
| gi 108758856 ref YP_634494.1 | transglycosylase SLT domain-containing protein        | C |
| gi 108757507 ref YP_634574.1 | beta-lactamase                                        | C |
| gi 108761912 ref YP_634796.1 | hypothetical protein MXAN_6679                        | A |
| gi 108761913 ref YP_634817.1 | hypothetical protein MXAN_6700                        | C |
| gi 108759598 ref YP_635219.1 | Tat pathway signal sequence domain-containing protein | A |
| gi 108759605 ref YP_635431.1 | Slt family transglycosylase                           | D |
| gi 108761372 ref YP_635494.1 | class I chitinase                                     | C |

|                                     |                |               |
|-------------------------------------|----------------|---------------|
| <i>Neisseria meningitidis</i> G2136 |                |               |
| <b>GI ID</b>                        | <b>Protein</b> | <b>*Class</b> |

|                                 |                                                                             |   |
|---------------------------------|-----------------------------------------------------------------------------|---|
| gi 385339376 ref YP_005893248.1 | TonB-dependent siderophore receptor                                         | C |
| gi 385339471 ref YP_005893343.1 | hemagglutinin/hemolysin family protein                                      | A |
| gi 385339546 ref YP_005893418.1 | copper ABC transporter periplasmic copper-binding protein                   | A |
| gi 385339593 ref YP_005893465.1 | putative putrescene ABC transporter, periplasmic putrescine-binding protein | C |
| gi 385339625 ref YP_005893497.1 | hypothetical protein NMBG2136_0596                                          | A |
| gi 385339644 ref YP_005893516.1 | N-acetylmuramoyl-L-alanine amidase                                          | A |
| gi 385339676 ref YP_005893548.1 | IgA-specific serine endopeptidase                                           | A |
| gi 385339727 ref YP_005893599.1 | D-alanyl-D-alanine carboxypeptidase                                         | B |
| gi 385339976 ref YP_005893848.1 | N-acetylmuramoyl-L-alanine amidase                                          | A |
| gi 385340003 ref YP_005893875.1 | hypothetical protein NMBG2136_0990                                          | C |
| gi 385340010 ref YP_005893882.1 | sulfate ABC transporter substrate-binding protein                           | C |
| gi 385340206 ref YP_005894078.1 | transglycosylase SLT/LysM domain protein                                    | C |
| gi 385340352 ref YP_005894224.1 | transglycosylase SLT domain-containing protein                              | C |
| gi 385340369 ref YP_005894241.1 | LysM domain/M23 peptidase domain protein                                    | C |
| gi 385340377 ref YP_005894249.1 | heme-utilization protein Hup                                                | A |
| gi 385340416 ref YP_005894288.1 | lactoferrin-binding protein A                                               | C |
| gi 385340490 ref YP_005894362.1 | hypothetical protein NMBG2136_1505                                          | C |
| gi 385340613 ref YP_005894485.1 | transferrin-binding protein 1                                               | C |
| gi 385340618 ref YP_005894490.1 | N-acetylmuramoyl-L-alanine amidase                                          | A |
| gi 385340695 ref YP_005894567.1 | hypothetical protein NMBG2136_1726                                          | A |
| gi 385340795 ref YP_005894667.1 | transglycosylase SLT domain-containing protein                              | C |
| gi 385340816 ref YP_005894688.1 | hypothetical protein NMBG2136_1862                                          | C |
| gi 385340818 ref YP_005894690.1 | hemoglobin and hemoglobin-haptoglobin-binding protein B precursor           | C |

| <i>Paenibacillus polymyxa</i> CR1 |                                 |        |
|-----------------------------------|---------------------------------|--------|
| GI ID                             | Protein                         | *Class |
| gi 565990188 ref YP_008909728.1   | pectate lyase                   | A      |
| gi 565990534 ref YP_008910104.1   | peptidase m28                   | A      |
| gi 565990569 ref YP_008910141.1   | hypothetical protein X809_03145 | A      |

|                                 |                                          |   |
|---------------------------------|------------------------------------------|---|
| gi 565990822 ref YP_008910410.1 | rhamnogalacturonate lyase                | A |
| gi 565990877 ref YP_008910469.1 | hypothetical protein X809_04870          | A |
| gi 565990989 ref YP_008910587.1 | phospholipid phosphatase                 | C |
| gi 565991163 ref YP_008910803.1 | hypothetical protein X809_06555          | C |
| gi 565991166 ref YP_008910807.1 | N-acetylmuramoyl-L-alanine amidase       | A |
| gi 565991466 ref YP_008911122.1 | beta-xylosidase                          | C |
| gi 565991557 ref YP_008911220.1 | lytic transglycosylase                   | C |
| gi 565994995 ref YP_008911279.1 | hypothetical protein X809_09020          | A |
| gi 565991611 ref YP_008911280.1 | type IV secretion protein Rhs            | A |
| gi 565991688 ref YP_008911358.1 | N-acetylmuramoyl-L-alanine amidase       | A |
| gi 565995051 ref YP_008912089.1 | hypothetical protein X809_13220          | C |
| gi 565992414 ref YP_008912160.1 | lytic transglycosylase                   | C |
| gi 565992438 ref YP_008912195.1 | arabinoxylan arabinofuranohydrolase      | A |
| gi 565992703 ref YP_008912489.1 | cwlv                                     | A |
| gi 565992704 ref YP_008912490.1 | cwlu                                     | A |
| gi 565992727 ref YP_008912514.1 | alkaline phosphatase                     | A |
| gi 565992919 ref YP_008912710.1 | DNA-directed RNA polymerase subunit beta | A |
| gi 565993024 ref YP_008912818.1 | sugar ABC transporter                    | C |
| gi 565993151 ref YP_008912948.1 | lytic transglycosylase                   | C |
| gi 565993417 ref YP_008913258.1 | TldD protein                             | A |
| gi 565993466 ref YP_008913326.1 | serine protease                          | A |
| gi 565993481 ref YP_008913341.1 | endo-1,3-beta-glucanase                  | A |
| gi 565993784 ref YP_008913657.1 | bacillolysin                             | A |
| gi 565993785 ref YP_008913658.1 | bacillolysin                             | A |
| gi 565993839 ref YP_008913714.1 | mannanase                                | A |
| gi 565994167 ref YP_008914070.1 | N-acetylmuramoyl-L-alanine amidase       | A |
| gi 565994303 ref YP_008914243.1 | mannan endo-1,4-beta-mannosidase         | A |
| gi 565994371 ref YP_008914322.1 | copper amine oxidase                     | C |
| gi 565994375 ref YP_008914326.1 | hypothetical protein X809_25035          | A |

|                                                         |                                                                      |               |
|---------------------------------------------------------|----------------------------------------------------------------------|---------------|
| gi 565994592 ref YP_008914555.1                         | arabinanase                                                          | A             |
| gi 565994639 ref YP_008914606.1                         | alpha-amylase                                                        | A             |
| gi 565994659 ref YP_008914626.1                         | hypothetical protein X809_26560                                      | C             |
| gi 565994809 ref YP_008914794.1                         | cellulase                                                            | A             |
| <i>Pasteurella multocida</i> subsp. multocida str. 3480 |                                                                      |               |
| <b>GI ID</b>                                            | <b>Protein</b>                                                       | <b>*Class</b> |
| gi 386833945 ref YP_006239260.1                         | AmiC protein                                                         | A             |
| gi 386834140 ref YP_006239455.1                         | D-alanyl-D-alanine carboxypeptidase/D-alanyl-D-alanine-endopeptidase | B             |
| gi 386834231 ref YP_006239546.1                         | LppC                                                                 | C             |
| gi 386834525 ref YP_006239841.1                         | peptidoglycan amidase MepA                                           | B             |
| gi 386834817 ref YP_006240134.1                         | N-acetylmuramyl L-alanine amidase, putative                          | A             |
| gi 386834871 ref YP_006240188.1                         | phage endolysin, putative                                            | C             |
| gi 386834909 ref YP_006240226.1                         | ArtI protein                                                         | C             |
| gi 386834954 ref YP_006240271.1                         | 2',3'-cyclic-nucleotide 2'-phosphodiesterase                         | A             |
| gi 386835445 ref YP_006240764.1                         | MapA protein                                                         | A             |
| gi 386835501 ref YP_006240820.1                         | HasR protein                                                         | C             |
| gi 386835696 ref YP_006241016.1                         | hypothetical protein                                                 | A             |

|                                 |                                                  |               |
|---------------------------------|--------------------------------------------------|---------------|
| <i>Prevotella ruminicola</i> 23 |                                                  |               |
| <b>GI ID</b>                    | <b>Protein</b>                                   | <b>*Class</b> |
| gi 294672897 ref YP_003573513.1 | N-acetylmuramoyl-L-alanine amidase               | A             |
| gi 294672936 ref YP_003573552.1 | TonB dependent receptor                          | A             |
| gi 294673066 ref YP_003573682.1 | hypothetical protein PRU_0294                    | C             |
| gi 294673151 ref YP_003573767.1 | transglycosylase SLT domain-containing protein   | C             |
| gi 294673377 ref YP_003573993.1 | outer membrane receptor (OMR) family transporter | A             |
| gi 294673527 ref YP_003574143.1 | N-acetylmuramoyl-L-alanine amidase               | A             |
| gi 294673552 ref YP_003574168.1 | hypothetical protein PRU_0814                    | C             |
| gi 294673698 ref YP_003574314.1 | hemagglutinin                                    | A             |

|                                 |                                                  |   |
|---------------------------------|--------------------------------------------------|---|
| gi 294673742 ref YP_003574358.1 | hypothetical protein PRU_1026                    | C |
| gi 294673796 ref YP_003574412.1 | outer membrane receptor (OMR) family transporter | A |
| gi 294673840 ref YP_003574456.1 | N-acetylmuramoyl-L-alanine amidase               | A |
| gi 294673864 ref YP_003574480.1 | TonB dependent receptor                          | A |
| gi 294673865 ref YP_003574481.1 | lipoprotein                                      | C |
| gi 294673928 ref YP_003574544.1 | lipoprotein                                      | A |
| gi 294673950 ref YP_003574566.1 | hypothetical protein PRU_1251                    | A |
| gi 294673966 ref YP_003574582.1 | TonB dependent receptor                          | A |
| gi 294673969 ref YP_003574585.1 | GLUG domain-containing protein                   | A |
| gi 294673984 ref YP_003574600.1 | N-acetylmuramoyl-L-alanine amidase               | A |
| gi 294674152 ref YP_003574768.1 | outer membrane protein SusC                      | A |
| gi 294674153 ref YP_003574769.1 | hypothetical protein PRU_1463                    | C |
| gi 294674254 ref YP_003574870.1 | lipoprotein                                      | A |
| gi 294674258 ref YP_003574874.1 | N-acetylmuramoyl-L-alanine amidase               | A |
| gi 294674270 ref YP_003574886.1 | hypothetical protein PRU_1586                    | C |
| gi 294674274 ref YP_003574890.1 | receptor antigen RagA                            | A |
| gi 294674278 ref YP_003574894.1 | outer membrane protein SusC                      | A |
| gi 294674453 ref YP_003575069.1 | N-acetylmuramoyl-L-alanine amidase               | A |
| gi 294674508 ref YP_003575124.1 | RHS/YD repeat protein                            | C |
| gi 294674515 ref YP_003575131.1 | N-acetylmuramoyl-L-alanine amidase               | A |
| gi 294674542 ref YP_003575158.1 | receptor antigen RagA                            | A |
| gi 294674543 ref YP_003575159.1 | lipoprotein                                      | C |
| gi 294674544 ref YP_003575160.1 | lipoprotein                                      | C |
| gi 294674551 ref YP_003575167.1 | lysozyme                                         | C |
| gi 294674554 ref YP_003575170.1 | hypothetical protein PRU_1886                    | A |
| gi 294674555 ref YP_003575171.1 | lipoprotein                                      | C |
| gi 294674556 ref YP_003575172.1 | TonB dependent receptor                          | A |
| gi 294674557 ref YP_003575173.1 | hypothetical protein PRU_1889                    | C |
| gi 294674614 ref YP_003575230.1 | receptor antigen RagA                            | A |

|                                 |                                                  |   |
|---------------------------------|--------------------------------------------------|---|
| gi 294674730 ref YP_003575346.1 | hypothetical protein PRU_2074                    | A |
| gi 294674732 ref YP_003575348.1 | family 43 glycosyl hydrolase                     | A |
| gi 294674819 ref YP_003575435.1 | hypothetical protein PRU_2169                    | C |
| gi 294674823 ref YP_003575439.1 | hypothetical protein PRU_2173                    | A |
| gi 294674869 ref YP_003575485.1 | lipoprotein                                      | C |
| gi 294674870 ref YP_003575486.1 | TonB dependent receptor                          | A |
| gi 294674873 ref YP_003575489.1 | hypothetical protein PRU_2228                    | A |
| gi 294674914 ref YP_003575530.1 | hypothetical protein PRU_2272                    | A |
| gi 294675062 ref YP_003575678.1 | N-acetylmuramoyl-L-alanine amidase               | A |
| gi 294675072 ref YP_003575688.1 | outer membrane protein                           | A |
| gi 294675073 ref YP_003575689.1 | lipoprotein                                      | C |
| gi 294675079 ref YP_003575695.1 | receptor antigen RagA                            | A |
| gi 294675122 ref YP_003575738.1 | outer membrane receptor (OMR) family transporter | A |
| gi 294675312 ref YP_003575928.1 | outer membrane protein SusC                      | A |
| gi 294675328 ref YP_003575944.1 | hypothetical protein PRU_2697                    | A |
| gi 294675335 ref YP_003575951.1 | TonB dependent receptor                          | A |
| gi 294675363 ref YP_003575979.1 | hypothetical protein PRU_2734                    | A |
| gi 294675365 ref YP_003575981.1 | hypothetical protein PRU_2736                    | A |
| gi 294675429 ref YP_003576045.1 | lipoprotein                                      | A |
| gi 294675448 ref YP_003576064.1 | receptor antigen RagA                            | A |
| gi 294675517 ref YP_003576133.1 | hypothetical protein PRU_2899                    | C |

| <i>Pseudomonas aeruginosa</i> B136-33 |                                  |        |
|---------------------------------------|----------------------------------|--------|
| GI ID                                 | Protein                          | *Class |
| gi 478476228 ref YP_007706879.1       | phospholipase C                  | A      |
| gi 478476251 ref YP_007706902.1       | hypothetical protein G655_00255  | A      |
| gi 478476289 ref YP_007706940.1       | hypothetical protein G655_00445  | C      |
| gi 478476391 ref YP_007707042.1       | putative TonB-dependent receptor | C      |
| gi 478476588 ref YP_007707239.1       | hypothetical protein G655_01950  | C      |

|                                 |                                                                      |   |
|---------------------------------|----------------------------------------------------------------------|---|
| gi 478476776 ref YP_007707427.1 | hypothetical protein G655_02890                                      | C |
| gi 478476822 ref YP_007707473.1 | putative bacteriophage protein                                       | C |
| gi 478476825 ref YP_007707476.1 | tail fiber                                                           | C |
| gi 478476835 ref YP_007707486.1 | lytic enzyme                                                         | C |
| gi 478476955 ref YP_007707606.1 | putative porin                                                       | C |
| gi 478477131 ref YP_007707782.1 | penicillin-binding protein 2                                         | A |
| gi 478477133 ref YP_007707784.1 | lytic murein transglycosylase B                                      | C |
| gi 478477141 ref YP_007707792.1 | putative murein transglycosylase                                     | C |
| gi 478477236 ref YP_007707887.1 | Fe(III) dicitrate transport protein FecA                             | C |
| gi 478477303 ref YP_007707954.1 | Rhs family protein-like protein                                      | C |
| gi 478477391 ref YP_007708042.1 | membrane-bound lytic transglycosylase F                              | C |
| gi 478477623 ref YP_007708274.1 | putative serine protease                                             | C |
| gi 478477718 ref YP_007708369.1 | hypothetical protein G655_07610                                      | C |
| gi 478477736 ref YP_007708387.1 | secretion protein                                                    | C |
| gi 478477835 ref YP_007708486.1 | phosphonate ABC transporter periplasmic phosphonate-binding protein  | C |
| gi 478478073 ref YP_007708724.1 | glycine betaine transmethylase                                       | A |
| gi 478478074 ref YP_007708725.1 | hypothetical protein G655_09390                                      | C |
| gi 478478106 ref YP_007708757.1 | D-alanyl-D-alanine carboxypeptidase/D-alanyl-D-alanine-endopeptidase | B |
| gi 478478133 ref YP_007708784.1 | putative soluble lytic transglycosylase                              | C |
| gi 478478246 ref YP_007708897.1 | TonB-dependent receptor                                              | A |
| gi 478478292 ref YP_007708943.1 | Slr family transglycosylase                                          | C |
| gi 478478743 ref YP_007709394.1 | hypothetical protein G655_12755                                      | C |
| gi 478478782 ref YP_007709433.1 | porin                                                                | C |
| gi 478478824 ref YP_007709475.1 | hypothetical protein G655_13160                                      | C |
| gi 478478841 ref YP_007709492.1 | type VI secretion protein IcmF                                       | C |
| gi 478478867 ref YP_007709518.1 | TonB-dependent receptor                                              | C |
| gi 478478928 ref YP_007709579.1 | penicillin-binding protein 3A                                        | A |
| gi 478478971 ref YP_007709622.1 | hypothetical protein G655_13895                                      | C |
| gi 478479123 ref YP_007709774.1 | TonB-dependent receptor                                              | C |

|                                 |                                                               |   |
|---------------------------------|---------------------------------------------------------------|---|
| gi 478479142 ref YP_007709793.1 | TonB dependent receptor                                       | C |
| gi 478479155 ref YP_007709806.1 | hypothetical protein G655_14815                               | C |
| gi 478479177 ref YP_007709828.1 | thiamine pyrophosphate protein                                | C |
| gi 478479345 ref YP_007709996.1 | LasA protease                                                 | C |
| gi 478479408 ref YP_007710059.1 | membrane-bound lytic murein transglycosylase D                | C |
| gi 478479567 ref YP_007710218.1 | hypothetical protein G655_16890                               | C |
| gi 478479951 ref YP_007710602.1 | putative tonB-dependent receptor                              | A |
| gi 478480067 ref YP_007710718.1 | transglycosylase                                              | C |
| gi 478480158 ref YP_007710809.1 | flagellar hook-associated protein FlgK                        | C |
| gi 478480228 ref YP_007710879.1 | cis,cis-muconate transporter MucK                             | C |
| gi 478480243 ref YP_007710894.1 | hypothetical protein G655_20275                               | C |
| gi 478480389 ref YP_007711040.1 | D-alanyl-D-alanine endopeptidase                              | B |
| gi 478480407 ref YP_007711058.1 | chitin-binding protein CbpD                                   | C |
| gi 478480452 ref YP_007711103.1 | AmpDh3                                                        | A |
| gi 478480571 ref YP_007711222.1 | hypothetical protein G655_21915                               | A |
| gi 478480758 ref YP_007711409.1 | murein hydrolase B                                            | C |
| gi 478480814 ref YP_007711465.1 | ABC transporter binding protein                               | C |
| gi 478480816 ref YP_007711467.1 | binding protein component of ABC transporter                  | C |
| gi 478480836 ref YP_007711487.1 | N-acetyl-anhydromuranmyl-L-alanine amidase                    | A |
| gi 478480914 ref YP_007711565.1 | soluble lytic murein transglycosylase                         | C |
| gi 478480986 ref YP_007711637.1 | type 4 fimbrial biogenesis protein                            | C |
| gi 478481045 ref YP_007711696.1 | catalase                                                      | A |
| gi 478481083 ref YP_007711734.1 | hypothetical protein G655_24520                               | C |
| gi 478481145 ref YP_007711796.1 | Heme/Hemoglobin uptake outer membrane receptor PhuR precursor | A |
| gi 478481312 ref YP_007711963.1 | hypothetical protein G655_25665                               | C |
| gi 478481344 ref YP_007711995.1 | putative extracellular heme-binding protein                   | C |
| gi 478481395 ref YP_007712046.1 | N-acetylmuramoyl-L-alanine amidase                            | A |
| gi 478481422 ref YP_007712073.1 | outer membrane protein                                        | C |
| gi 478481480 ref YP_007712131.1 | short chain dehydrogenase                                     | C |

|                                 |                                                                 |   |
|---------------------------------|-----------------------------------------------------------------|---|
| gi 478481652 ref YP_007712303.1 | LD-carboxypeptidase                                             | B |
| gi 478481776 ref YP_007712427.1 | putative binding protein component of ABC dipeptide transporter | C |
| gi 478481946 ref YP_007712597.1 | N-acetylmuramoyl-L-alanine amidase                              | A |
| gi 478481998 ref YP_007712649.1 | N-acetylmuramoyl-L-alanine amidase                              | A |

| <i>Rickettsia rickettsii</i> str. Hino |                                                 |        |
|----------------------------------------|-------------------------------------------------|--------|
| GI ID                                  | Protein                                         | *Class |
| gi 379017678 ref YP_005293913.1        | negative regulator of beta-lactamase expression | A      |
| gi 379017733 ref YP_005293968.1        | soluble lytic murein transglycosylase           | C      |
| gi 379018235 ref YP_005294470.1        | outer membrane protein B                        | A      |
| gi 379018490 ref YP_005294725.1        | N-acetylmuramoyl-L-alanine amidase              | A      |

| <i>Salmonella enterica subsp. enterica serovar Typhi</i><br>str. CT18 |                                                    |        |
|-----------------------------------------------------------------------|----------------------------------------------------|--------|
| GI ID                                                                 | Protein                                            | *Class |
| gi 16759009 ref NP_454626.1                                           | hypothetical protein STY0016                       | C      |
| gi 16759143 ref NP_454760.1                                           | anhydro-N-acetylmuramyl-tripeptide amidase         | A      |
| gi 16759246 ref NP_454863.1                                           | membrane-bound lytic murein transglycosylase D     | C      |
| gi 16759255 ref NP_454872.1                                           | type VI system protein                             | C      |
| gi 16759284 ref NP_454901.1                                           | Rhs-family protein                                 | C      |
| gi 16759351 ref NP_454968.1                                           | autotransporter/virulence factor                   | A      |
| gi 16759751 ref NP_455368.1                                           | outer membrane protein X                           | C      |
| gi 16759766 ref NP_455383.1                                           | ABC transporter substrate-binding protein          | C      |
| gi 16759804 ref NP_455421.1                                           | N-acetylmuramoyl-L-alanine amidase                 | A      |
| gi 16759815 ref NP_455432.1                                           | macrolide transporter ATP-binding protein/permease | A      |
| gi 16759864 ref NP_455481.1                                           | murein L,D-transpeptidase                          | C      |
| gi 16759903 ref NP_455520.1                                           | bacteriophage protein                              | C      |
| gi 16759933 ref NP_455550.1                                           | hypothetical protein STY1072                       | C      |
| gi 16760058 ref NP_455675.1                                           | flagellar protein FlgJ                             | C      |

|                             |                                                 |   |
|-----------------------------|-------------------------------------------------|---|
| gi 16760059 ref NP_455676.1 | flagellar hook-associated protein 1             | C |
| gi 16760207 ref NP_455824.1 | murein peptide amidase A                        | A |
| gi 16760208 ref NP_455825.1 | periplasmic murein peptide-binding protein MppA | C |
| gi 16760258 ref NP_455875.1 | glucan biosynthesis protein D                   | C |
| gi 16760292 ref NP_455909.1 | TonB-dependent receptor YncD                    | A |
| gi 16760428 ref NP_456045.1 | bacteriophage baseplate protein                 | C |
| gi 16760442 ref NP_456059.1 | outer membrane protein                          | C |
| gi 16760608 ref NP_456225.1 | outer membrane protein                          | C |
| gi 16760660 ref NP_456277.1 | hypothetical protein STY1889                    | C |
| gi 16760690 ref NP_456307.1 | L,D-carboxypeptidase A                          | B |
| gi 16760757 ref NP_456374.1 | bacteriophage tail protein                      | C |
| gi 16760787 ref NP_456404.1 | endolysin                                       | C |
| gi 16760937 ref NP_456554.1 | outer membrane protein S1                       | C |
| gi 16761307 ref NP_456924.1 | penicillin-insensitive murein endopeptidase     | B |
| gi 16761368 ref NP_456985.1 | N-acetylmuramoyl-L-alanine amidase              | A |
| gi 16761395 ref NP_457012.1 | esterase                                        | A |
| gi 16761429 ref NP_457046.1 | exodeoxyribonuclease large subunit              | A |
| gi 16761431 ref NP_457048.1 | hypothetical protein STY2760                    | A |
| gi 16761541 ref NP_457158.1 | large repetitive protein                        | A |
| gi 16761607 ref NP_457224.1 | membrane-bound lytic transglycosylase B         | C |
| gi 16761654 ref NP_457271.1 | cell invasion protein                           | D |
| gi 16761767 ref NP_457384.1 | N-acetylmuramoyl-L-alanine amidase              | A |
| gi 16761888 ref NP_457505.1 | membrane-bound lytic murein transglycosylase C  | C |
| gi 16762062 ref NP_457679.1 | penicillin-binding protein                      | B |
| gi 16762256 ref NP_457873.1 | lysozyme                                        | C |
| gi 16762262 ref NP_457879.1 | phage baseplate assembly protein                | C |
| gi 16762647 ref NP_458264.1 | exported amidase                                | C |
| gi 16762664 ref NP_458281.1 | biotin sulfoxide reductase                      | A |
| gi 16762667 ref NP_458284.1 | hypothetical protein STY4161                    | A |

|                              |                                    |   |
|------------------------------|------------------------------------|---|
| gi 16762697 ref NP_458314.1  | phage-like lysozyme                | C |
| gi 16763038 ref NP_458655.1  | hypothetical protein STY4570       | A |
| gi 16763079 ref NP_458696.1  | phage baseplate assembly protein   | C |
| gi 16763084 ref NP_458701.1  | hypothetical protein STY4619       | C |
| gi 16763085 ref NP_458702.1  | lysozyme                           | C |
| gi 16763177 ref NP_458794.1  | N-acetylmuramoyl-L-alanine amidase | A |
| gi 541470449 ref NP_458990.3 | lytic murein transglycosylase      | C |

| <i>Salmonella enterica subsp. enterica serovar Typhimurium</i> str. DT104 |                                                     |        |
|---------------------------------------------------------------------------|-----------------------------------------------------|--------|
| GI ID                                                                     | Protein                                             | *Class |
| gi 550899447 ref YP_008668539.1                                           | hypothetical protein DT104_00151                    | C      |
| gi 550899571 ref YP_008668663.1                                           | anhydro-N-acetylmuramyl-tripeptide amidase          | A      |
| gi 550899675 ref YP_008668767.1                                           | membrane-bound lytic murein transglycosylase D      | C      |
| gi 550899682 ref YP_008668774.1                                           | type vi secretion system lysozyme-like SciD protein | C      |
| gi 550899687 ref YP_008668779.1                                           | type IV secretion system SciI protein               | C      |
| gi 550899707 ref YP_008668799.1                                           | rhs-family protein                                  | C      |
| gi 550899761 ref YP_008668853.1                                           | Endopeptidase                                       | B      |
| gi 550899827 ref YP_008668919.1                                           | autotransporter/virulence factor                    | A      |
| gi 550900249 ref YP_008669341.1                                           | outer membrane protein X precursor                  | C      |
| gi 550900264 ref YP_008669356.1                                           | ABC transporter substrate-binding protein           | C      |
| gi 550900307 ref YP_008669399.1                                           | N-acetylmuramoyl-L-alanine amidase                  | A      |
| gi 550900318 ref YP_008669410.1                                           | ABC transporter                                     | A      |
| gi 550900369 ref YP_008669461.1                                           | hypothetical protein DT104_09691                    | C      |
| gi 550900404 ref YP_008669496.1                                           | phage lysozyme                                      | C      |
| gi 550900405 ref YP_008669497.1                                           | phage lysozyme                                      | C      |
| gi 550900417 ref YP_008669509.1                                           | tape measure protein                                | C      |
| gi 550900428 ref YP_008669520.1                                           | Tail Fiber Protein                                  | A      |
| gi 550900558 ref YP_008669650.1                                           | flagellar protein FlgJ                              | C      |

|                                 |                                                 |   |
|---------------------------------|-------------------------------------------------|---|
| gi 550900559 ref YP_008669651.1 | flagellar hook-associated protein 1             | C |
| gi 550900581 ref YP_008669673.1 | outer-membrane receptor                         | C |
| gi 550900655 ref YP_008669747.1 | outer membrane protein                          | C |
| gi 550900947 ref YP_008670039.1 | TonB-dependent receptor YncD                    | A |
| gi 550900982 ref YP_008670074.1 | glucans biosynthesis protein D                  | C |
| gi 550901038 ref YP_008670130.1 | periplasmic murein peptide-binding protein MppA | C |
| gi 550901039 ref YP_008670131.1 | hypothetical protein DT104_16501                | A |
| gi 550901155 ref YP_008670247.1 | hypothetical protein DT104_17681                | B |
| gi 550901233 ref YP_008670325.1 | prophage protein                                | A |
| gi 550901239 ref YP_008670331.1 | transglycosylase                                | C |
| gi 550901253 ref YP_008670345.1 | Lysozyme                                        | C |
| gi 550901388 ref YP_008670480.1 | outer membrane protein S1                       | A |
| gi 550901606 ref YP_008670698.1 | penicillin-binding protein                      | B |
| gi 550901817 ref YP_008670909.1 | penicillin-insensitive murein endopeptidase     | B |
| gi 550901877 ref YP_008670969.1 | N-acetylmuramoyl-L-alanine amidase              | A |
| gi 550901905 ref YP_008670997.1 | hypothetical protein DT104_25311                | A |
| gi 550901939 ref YP_008671031.1 | host colonisation factor ShdA                   | A |
| gi 550901940 ref YP_008671032.1 | protein RatA                                    | A |
| gi 550901990 ref YP_008671082.1 | hypothetical protein DT104_26181                | C |
| gi 550902014 ref YP_008671106.1 | DNA recombinase                                 | A |
| gi 550902021 ref YP_008671113.1 | prophage protein                                | C |
| gi 550902038 ref YP_008671130.1 | prophage protein                                | C |
| gi 550902039 ref YP_008671131.1 | phage encoded lysozyme                          | C |
| gi 550902109 ref YP_008671201.1 | large repetitive protein                        | A |
| gi 550902196 ref YP_008671288.1 | membrane-bound lytic murein transglycosylase B  | C |
| gi 550902241 ref YP_008671333.1 | cell invasion protein                           | D |
| gi 550902354 ref YP_008671446.1 | N-acetylmuramoyl-L-alanine amidase              | A |
| gi 550902474 ref YP_008671566.1 | membrane-bound lytic murein transglycosylase C  | C |
| gi 550902482 ref YP_008671574.1 | arylsulfatase                                   | C |

|                                 |                                        |   |
|---------------------------------|----------------------------------------|---|
| gi 550902655 ref YP_008671747.1 | penicillin-binding protein             | B |
| gi 550902823 ref YP_008671915.1 | surface-exposed virulence protein BigA | A |
| gi 550902985 ref YP_008672077.1 | lipoprotein                            | A |
| gi 550902988 ref YP_008672080.1 | biotin sulfoxide reductase             | A |
| gi 550903005 ref YP_008672097.1 | amidase                                | C |
| gi 550903100 ref YP_008672192.1 | autotransported protein MisL           | A |
| gi 550903489 ref YP_008672581.1 | vitamin B12 receptor protein           | A |
| gi 550903561 ref YP_008672653.1 | hypothetical protein DT104_42111       | C |
| gi 550903695 ref YP_008672787.1 | N-acetylmuramoyl-L-alanine amidase     | A |
| gi 550903909 ref YP_008673001.1 | lytic murein transglycosylase          | C |

| <i>Shigella flexneri</i> 2a str. 2457T |                                                |        |
|----------------------------------------|------------------------------------------------|--------|
| GI ID                                  | Protein                                        | *Class |
| gi 30061676 ref NP_835847.1            | N-acetyl-anhydromuramyl-L-alanine amidase      | A      |
| gi 30061763 ref NP_835934.1            | membrane-bound lytic murein transglycosylase D | C      |
| gi 30061781 ref NP_835952.1            | endolysin R of prophage CP-933V, partial       | C      |
| gi 30061800 ref NP_835971.1            | DNA transfer protein                           | C      |
| gi 30061837 ref NP_836008.1            | Rhs-family protein                             | C      |
| gi 30062230 ref NP_836401.1            | endolysin R of prophage CP-933V                | C      |
| gi 30062231 ref NP_836402.1            | endopeptidase                                  | B      |
| gi 30062298 ref NP_836469.1            | outer membrane protein X                       | C      |
| gi 30062351 ref NP_836522.1            | regulator                                      | A      |
| gi 30062460 ref NP_836631.1            | hypothetical protein S0986                     | C      |
| gi 30062617 ref NP_836788.1            | flagellar rod assembly protein/muramidase FlgJ | C      |
| gi 30062687 ref NP_836858.1            | hypothetical protein S1242                     | A      |
| gi 30062710 ref NP_836881.1            | L,D-carboxypeptidase A                         | B      |
| gi 30062726 ref NP_836897.1            | adhesion and penetration protein               | A      |
| gi 30062815 ref NP_836986.1            | peptide transport periplasmic protein          | C      |
| gi 30062844 ref NP_837015.1            | murein peptide amidase A                       | A      |

|                              |                                                  |   |
|------------------------------|--------------------------------------------------|---|
| gi 30062850 ref NP_837021.1  | transport periplasmic protein                    | C |
| gi 30063011 ref NP_837182.1  | hypothetical protein S1625                       | C |
| gi 30063541 ref NP_837712.1  | hypothetical protein S2289                       | C |
| gi 161486468 ref NP_837752.2 | D-alanyl-D-alanine endopeptidase                 | B |
| gi 30063753 ref NP_837924.1  | hypothetical protein S2538                       | B |
| gi 30063754 ref NP_837925.1  | penicillin-insensitive murein endopeptidase      | B |
| gi 30063765 ref NP_837936.1  | long-chain fatty acid outer membrane transporter | C |
| gi 30063827 ref NP_837998.1  | N-acetylmuramoyl-l-alanine amidase I             | A |
| gi 30063868 ref NP_838039.1  | hypothetical protein S2687                       | C |
| gi 30063945 ref NP_838116.1  | transglycosylase                                 | C |
| gi 30063958 ref NP_838129.1  | hypothetical protein S2790                       | C |
| gi 30064031 ref NP_838202.1  | LysM domain/BON superfamily protein              | C |
| gi 30064061 ref NP_838232.1  | murein hydrolase B                               | C |
| gi 30064159 ref NP_838330.1  | amidase                                          | A |
| gi 30064284 ref NP_838455.1  | murein transglycosylase C                        | C |
| gi 30064293 ref NP_838464.1  | serine protease precursor                        | A |
| gi 30064520 ref NP_838691.1  | D-alanyl-D-alanine carboxypeptidase              | B |
| gi 30064743 ref NP_838914.1  | vitamin B12/cobalamin outer membrane transporter | A |
| gi 30065145 ref NP_839316.1  | hypothetical protein S4155                       | C |
| gi 30065417 ref NP_839588.1  | hypothetical protein S4448                       | C |
| gi 30065527 ref NP_839698.1  | beta-lactamase                                   | B |
| gi 30065541 ref NP_839712.1  | N-acetylmuramoyl-l-alanine amidase II            | A |
| gi 161486362 ref NP_839800.2 | lytic murein transglycosylase                    | C |

| <i>Staphylococcus aureus subsp. aureus</i> ST228 |                                         |        |
|--------------------------------------------------|-----------------------------------------|--------|
| GI ID                                            | Protein                                 | *Class |
| gi 470221981 ref YP_007620538.1                  | Lysostaphin                             | A      |
| gi 470222107 ref YP_007620664.1                  | N-acetylmuramoyl-L-alanine amidase sle1 | A      |
| gi 470222266 ref YP_007620823.1                  | Secretory antigen SsaA homologue        | A      |

|                                 |                                                |   |
|---------------------------------|------------------------------------------------|---|
| gi 470222491 ref YP_007621048.1 | Bifunctional autolysin                         | C |
| gi 470222773 ref YP_007621330.1 | C-terminal processing peptidase family protein | A |
| gi 470222931 ref YP_007621488.1 | Probable cell wall amidase LytH                | A |
| gi 470223049 ref YP_007621606.1 | Family=4 N-acetylmuramoyl-L-alanine amidase    | C |
| gi 470223179 ref YP_007621736.1 | Lytic enzyme                                   | A |
| gi 470223183 ref YP_007621740.1 | Bacteriophage tail length tape measure protein | D |
| gi 470223386 ref YP_007621943.1 | Urease subunit alpha                           | A |
| gi 470223393 ref YP_007621950.1 | Staphylococcal secretory antigen ssaA2         | A |
| gi 470223607 ref YP_007622164.1 | Staphylococcal secretory antigen ssaA          | A |
| gi 470223610 ref YP_007622167.1 | Probable transglycosylase isaA                 | C |
| gi 470223677 ref YP_007622234.1 | Similar to autolysin                           | C |

| <i>Staphylococcus epidermidis</i> ATCC 12228 |                                               |        |
|----------------------------------------------|-----------------------------------------------|--------|
| GI ID                                        | Protein                                       | *Class |
| gi 27467163 ref NP_763800.1                  | triacylglycerol lipase                        | A      |
| gi 27467351 ref NP_763988.1                  | secretory antigen SsaA-like protein           | A      |
| gi 27467455 ref NP_764092.1                  | hypothetical protein SE0537                   | A      |
| gi 27467668 ref NP_764305.1                  | N-acetylmuramoyl-L-alanine amidase            | A      |
| gi 27468231 ref NP_764868.1                  | N-acetylmuramoyl-L-alanine amidase            | A      |
| gi 27468361 ref NP_764998.1                  | hypothetical protein SE1443                   | A      |
| gi 27468790 ref NP_765427.1                  | ssaA protein                                  | A      |
| gi 27469042 ref NP_765679.1                  | ssaA protein                                  | A      |
| gi 27469044 ref NP_765681.1                  | hypothetical protein SE2126                   | C      |
| gi 27469115 ref NP_765752.1                  | alkaline phosphatase                          | A      |
| gi 27469149 ref NP_765786.1                  | N-acetylmuramoyl-L-alanine amidase            | A      |
| gi 27469237 ref NP_765874.1                  | autolysin (N-acetylmuramoyl-L-alanine amidase | A      |
| gi 27469291 ref NP_765928.1                  | 1,4-beta-N-acetylmuramidase                   | C      |

|                                             |  |  |
|---------------------------------------------|--|--|
| <i>Streptococcus pneumoniae</i> ATCC 700669 |  |  |
|---------------------------------------------|--|--|

| <b>GI ID</b>                    | <b>Protein</b>                              | <b>*Class</b> |
|---------------------------------|---------------------------------------------|---------------|
| gi 221231241 ref YP_002510393.1 | cell wall surface anchored protein          | A             |
| gi 221231242 ref YP_002510394.1 | penicillin-binding protein 1A               | C             |
| gi 221231747 ref YP_002510899.1 | glycosyl hydrolase                          | A             |
| gi 221232001 ref YP_002511153.1 | sialidase (neuraminidase)                   | A             |
| gi 221232082 ref YP_002511235.1 | cell wall hydrolase                         | B             |
| gi 221232275 ref YP_002511428.1 | autolysin                                   | A             |
| gi 221232276 ref YP_002511429.1 | antiholin                                   | A             |
| gi 221232280 ref YP_002511433.1 | platelet-binding phage protein              | A             |
| gi 221232334 ref YP_002511487.1 | exported choline-binding glycosyl hydrolase | C             |
| gi 221232666 ref YP_002511820.1 | cell wall-binding amidase                   | A             |

| <i>Streptococcus pyogenes</i> A20 |                                                                |               |
|-----------------------------------|----------------------------------------------------------------|---------------|
| <b>GI ID</b>                      | <b>Protein</b>                                                 | <b>*Class</b> |
| gi 410679721 ref YP_006932123.1   | hypothetical protein A20_0061c                                 | A             |
| gi 410680179 ref YP_006932581.1   | glycosyl hydrolases 25 family protein                          | A             |
| gi 410680343 ref YP_006932745.1   | mannosyl-glycoendo-beta-N-acetylglucosaminidase family protein | C             |
| gi 410680669 ref YP_006933071.1   | phage holin, LL-H family                                       | A             |
| gi 410680674 ref YP_006933076.1   | mannosyl-glycoendo-beta-N-acetylglucosaminidase family protein | A             |
| gi 410680732 ref YP_006933134.1   | cyclomaltodextrin glucanotransferase                           | A             |
| gi 410680839 ref YP_006933241.1   | mannosyl-glycoendo-beta-N-acetylglucosaminidase family protein | A             |
| gi 410681018 ref YP_006933420.1   | penicillin-binding protein 1A                                  | C             |
| gi 410681200 ref YP_006933602.1   | CHAP domain-containing protein                                 | A             |
| gi 410681339 ref YP_006933741.1   | pullulanase                                                    | A             |
| gi 410681372 ref YP_006933774.1   | C5a peptidase                                                  | A             |
| gi 410681408 ref YP_006933810.1   | penicillin-binding , 1A family protein                         | C             |
| gi 410681497 ref YP_006933899.1   | transglycosylase-like domain-containing protein                | C             |

| <i>Treponema pallidum subsp. pallidum str. Nichols</i> |  |  |
|--------------------------------------------------------|--|--|
|                                                        |  |  |

| <b>GI ID</b>                | <b>Protein</b>                            | <b>*Class</b> |
|-----------------------------|-------------------------------------------|---------------|
| gi 15639037 ref NP_218483.1 | soluble lytic transglycosylase,           | C             |
| gi 15639239 ref NP_218687.1 | N-acetylmuramoyl-L-alanine amidase (amiA) | A             |
| gi 15639560 ref NP_219010.1 | Tp70 protein                              | C             |
| gi 15639793 ref NP_219243.1 | femA protein,                             | C             |

| <i>Vibrio cholerae</i> O395     |                                                |               |
|---------------------------------|------------------------------------------------|---------------|
| <b>GI ID</b>                    | <b>Protein</b>                                 | <b>*Class</b> |
| gi 147673807 ref YP_001216126.1 | D-alanyl-D-alanine carboxypeptidase            | B             |
| gi 147673203 ref YP_001216193.1 | soluble lytic murein transglycosylase          | C             |
| gi 147674148 ref YP_001216207.1 | protease                                       | B             |
| gi 147673383 ref YP_001216326.1 | lipoprotein                                    | A             |
| gi 147674227 ref YP_001216347.1 | transglycosylase                               | C             |
| gi 147674390 ref YP_001216595.1 | hypothetical protein VC0395_A0645              | C             |
| gi 147673728 ref YP_001216638.1 | bacteriophage Mu tail sheath protein (GpL)     | C             |
| gi 147674078 ref YP_001216699.1 | bacteriophage Mu tail sheath protein (GpL)     | C             |
| gi 147675379 ref YP_001217171.1 | cadherin domain-containing protein             | A             |
| gi 147673281 ref YP_001217324.1 | neuraminidase                                  | A             |
| gi 147675561 ref YP_001217481.1 | chitinase                                      | C             |
| gi 147673804 ref YP_001217753.1 | membrane-bound lytic murein transglycosylase D | C             |
| gi 147673296 ref YP_001217921.1 | N-acetyl-anhydromuranmyl-L-alanine amidase     | A             |
| gi 147674843 ref YP_001218242.1 | TonB-dependent receptor                        | C             |
| gi 147675682 ref YP_001218613.1 | N-acetylmuramoyl-L-alanine amidase             | A             |

| <i>Yersinia pestis</i> A1122    |                                |               |
|---------------------------------|--------------------------------|---------------|
| <b>GI ID</b>                    | <b>Protein</b>                 | <b>*Class</b> |
| gi 384137037 ref YP_005519739.1 | putative kinase                | B             |
| gi 384137161 ref YP_005519863.1 | lac repressor                  | A             |
| gi 384137347 ref YP_005520049.1 | outer membrane channel protein | C             |

|                                 |                                                       |   |
|---------------------------------|-------------------------------------------------------|---|
| gi 384137406 ref YP_005520108.1 | putative autotransporter protein                      | C |
| gi 384137413 ref YP_005520115.1 | putative adhesin                                      | C |
| gi 384137424 ref YP_005520126.1 | putative autotransporter protein                      | A |
| gi 384137509 ref YP_005520211.1 | hypothetical protein A1122_02570                      | C |
| gi 384137517 ref YP_005520219.1 | LPS assembly outer membrane complex protein LptD      | A |
| gi 384137559 ref YP_005520261.1 | lytic murein transglycosylase                         | C |
| gi 384137648 ref YP_005520350.1 | N-acetylmuramoyl-L-alanine amidase-family protein     | A |
| gi 384137711 ref YP_005520413.1 | hypothetical protein A1122_03590                      | A |
| gi 384138154 ref YP_005520856.1 | periplasmic pectate lyase                             | C |
| gi 384138224 ref YP_005520926.1 | putative TonB dependent receptor protein              | A |
| gi 384138237 ref YP_005520939.1 | vitamin B12/cobalamin outer membrane transporter      | C |
| gi 384138442 ref YP_005521144.1 | hypothetical protein A1122_07345                      | C |
| gi 384138470 ref YP_005521172.1 | Rhs-like core protein                                 | A |
| gi 384138643 ref YP_005521345.1 | D-alanyl-D-alanine carboxypeptidase                   | B |
| gi 384138726 ref YP_005521428.1 | N-acetyl-anhydromuranmyl-L-alanine amidase            | A |
| gi 384138915 ref YP_005521617.1 | putative adhesin                                      | A |
| gi 384139126 ref YP_005521828.1 | putative autotransporter                              | A |
| gi 384139196 ref YP_005521898.1 | murein hydrolase B                                    | C |
| gi 384139337 ref YP_005522039.1 | membrane-bound lytic transglycosylase F               | C |
| gi 384139363 ref YP_005522065.1 | putative autotransporter protein                      | A |
| gi 384139407 ref YP_005522109.1 | penicillin-insensitive murein endopeptidase           | B |
| gi 384139431 ref YP_005522133.1 | hypothetical protein A1122_12405                      | C |
| gi 384139508 ref YP_005522210.1 | putative solute-binding protein                       | A |
| gi 384139522 ref YP_005522224.1 | glycine betaine transporter periplasmic subunit       | C |
| gi 384139668 ref YP_005522370.1 | outer membrane protein X                              | C |
| gi 384139684 ref YP_005522386.1 | putative hemolysin                                    | A |
| gi 384139737 ref YP_005522439.1 | putative membrane-bound lytic murein transglycosylase | C |
| gi 384139793 ref YP_005522495.1 | insecticidal toxin                                    | A |
| gi 384139833 ref YP_005522535.1 | murein peptide amidase A                              | B |

|                                 |                                                                                        |   |
|---------------------------------|----------------------------------------------------------------------------------------|---|
| gi 384139965 ref YP_005522667.1 | bifunctional indole-3-glycerol phosphate synthase/phosphoribosylanthranilate isomerase | C |
| gi 384140017 ref YP_005522719.1 | hypothetical protein A1122_15380                                                       | C |
| gi 384140037 ref YP_005522739.1 | putative phage host specificity protein                                                | A |
| gi 384140072 ref YP_005522774.1 | putative phage lysozyme                                                                | C |
| gi 384140126 ref YP_005522828.1 | putative hemolysin                                                                     | A |
| gi 384140230 ref YP_005522932.1 | hypothetical protein A1122_16460                                                       | C |
| gi 384140302 ref YP_005523004.1 | flagellar hook-associated protein FlgK                                                 | C |
| gi 384140303 ref YP_005523005.1 | flagellar rod assembly protein/muramidase FlgJ                                         | C |
| gi 384140398 ref YP_005523100.1 | N-acetylmuramoyl-L-alanine amidase                                                     | A |
| gi 384140431 ref YP_005523133.1 | N-acetylmuramoyl-L-alanine amidase                                                     | A |
| gi 384140439 ref YP_005523141.1 | hypothetical protein A1122_17520                                                       | A |
| gi 384140886 ref YP_005523588.1 | D-alanyl-D-alanine endopeptidase                                                       | B |
| gi 384140913 ref YP_005523615.1 | outer membrane protein C2                                                              | C |
| gi 384140939 ref YP_005523641.1 | outer membrane protease                                                                | C |
| gi 384140950 ref YP_005523652.1 | putative bacteriophage tail sheath protein                                             | A |
| gi 384141012 ref YP_005523714.1 | outer membrane usher protein PsaC                                                      | A |
| gi 384141110 ref YP_005523812.1 | N-acetylmuramoyl-L-alanine amidase                                                     | A |
| gi 384141122 ref YP_005523824.1 | putative TonB-dependent outer membrane receptor                                        | C |
